# Supplementary material for: Differential Effects of Environmental and Genetic Factors on T and B Cell Immune Traits
Source: PubMed Central journal article supplement — Cell Rep. 2016 Nov 3;17(9):2474–87. doi: 10.1016/j.celrep.2016.10.053 (PMC5130901; doi:10.1016/j.celrep.2016.10.053), 2016-11-03
Supplement: mmc5.pdf [file mmc5.pdf]

# Cell Reports

## Differential Effects of Environmental and Genetic Factors on T and B Cell Immune Traits

### Graphical Abstract

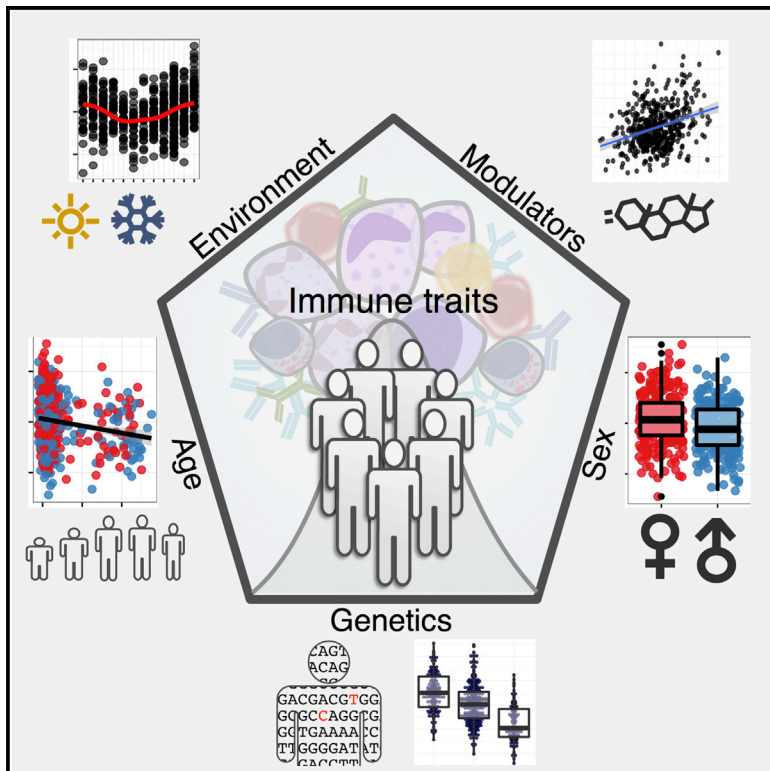

### Authors

Raul Aguirre-Gamboa, Irma Joosten, Paulo C.M. Urbano, ..., Vinod Kumar, Yang Li, Hans J.P.M. Koenen

### Correspondence

y.li01@umcg.nl (Y.L.),  
hans.koenen@radboudumc.nl  
(H.J.P.M.K.)

### In Brief

As part of the Human Functional Genomics Project, this study by Aguirre-Gamboa et al. maps the contribution of genetics and non-heritable factors onto immune-cell counts and immunoglobulin levels. They find that season and gender influence the abundance of most of B cell subpopulations.

### Highlights

- Understanding inter-individual variation of immune cells and immunoglobulin levels
- Season and gender influence B cell subpopulation abundance
- Identification of genetic loci that might regulate B cell levels in blood
- Cell count QTLs overlap with risk SNPs for (auto)immune/inflammatory disease

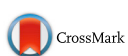

# Differential Effects of Environmental and Genetic Factors on T and B Cell Immune Traits

Raul Aguirre-Gamboa,<sup>1,9</sup> Irma Joosten,<sup>2,9</sup> Paulo C.M. Urbano,<sup>2</sup> Renate G. van der Molen,<sup>2</sup> Esther van Rijssen,<sup>2</sup> Bram van Cranenbroek,<sup>2</sup> Marije Oosting,<sup>3</sup> Sanne Smeekens,<sup>3</sup> Martin Jaeger,<sup>3</sup> Maria Zorro,<sup>1</sup> Sebo Withoff,<sup>1</sup> Antonius E. van Herwaarden,<sup>4</sup> Fred C.G.J. Sweep,<sup>4</sup> Romana T. Netea,<sup>3</sup> Morris A. Swertz,<sup>1,5</sup> Lude Franke,<sup>1</sup> Ramnik J. Xavier,<sup>6,7</sup> Leo A.B. Joosten,<sup>3</sup> Mihai G. Netea,<sup>3</sup> Cisca Wijmenga,<sup>1,8</sup> Vinod Kumar,<sup>1</sup> Yang Li,<sup>1,10,\*</sup> and Hans J.P.M. Koenen<sup>2,\*</sup>

<sup>1</sup>Department of Genetics, University Medical Center Groningen, University of Groningen, 9713 AV Groningen, the Netherlands

<sup>2</sup>Department of Laboratory Medicine, Laboratory for Medical Immunology, Radboud University Medical Center, 6525 GA Nijmegen, the Netherlands

<sup>3</sup>Department of Internal Medicine and Radboud Center for Infectious Diseases, Radboud University Medical Center, 6525 GA Nijmegen, the Netherlands

<sup>4</sup>Department of Laboratory Medicine, Laboratory for Clinical Chemistry, Radboud University Medical Center, 6525 GA Nijmegen, the Netherlands

<sup>5</sup>Genomics Coordination Center, University Medical Center Groningen, University of Groningen, 9713 AV Groningen, the Netherlands

<sup>6</sup>Center for Computational and Integrative Biology and Gastrointestinal Unit, Massachusetts General Hospital and Harvard School of Medicine, Boston, MA 02114, USA

<sup>7</sup>Broad Institute of MIT and Harvard University, Cambridge, MA 02142, USA

<sup>8</sup>Department of Immunology, Oslo University Hospital, University of Oslo, Rikshospitalet, 0372 Oslo Norway

<sup>9</sup>Co-first author

<sup>10</sup>Lead Contact

\*Correspondence: [y.li01@umcg.nl](mailto:y.li01@umcg.nl) (Y.L.), [hans.koenen@radboudumc.nl](mailto:hans.koenen@radboudumc.nl) (H.J.P.M.K.)

<http://dx.doi.org/10.1016/j.celrep.2016.10.053>

## SUMMARY

Effective immunity requires a complex network of cellular and humoral components that interact with each other and are influenced by different environmental and host factors. We used a systems biology approach to comprehensively assess the impact of environmental and genetic factors on immune cell populations in peripheral blood, including associations with immunoglobulin concentrations, from ~500 healthy volunteers from the Human Functional Genomics Project. Genetic heritability estimation showed that variations in T cell numbers are more strongly driven by genetic factors, while B cell counts are more environmentally influenced. Quantitative trait loci (QTL) mapping identified eight independent genomic loci associated with leukocyte count variation, including four associations with T and B cell subtypes. The QTLs identified were enriched among genome-wide association study (GWAS) SNPs reported to increase susceptibility to immune-mediated diseases. Our systems approach provides insights into cellular and humoral immune trait variability in humans.

## INTRODUCTION

Blood is a complex tissue consisting of a very specialized network of circulating immune cells and soluble factors that

are the morphological substrate of the human immune response. Among immune cells, the monocyte, neutrophil, and natural killer (NK) compartments are essential for first-line, innate immune responses, while T cells, B cells, and the latter's cognate immunoglobulin ([Ig] antibody) repertoire are essential for effective adaptive immune response to a wide variety of pathogens. Dysregulated immune cell or Ig numbers and/or functions can lead to an increased susceptibility to infections or to immune-mediated inflammatory disorders such as autoimmune diseases or allergy (Cho and Feldman, 2015; Tangye et al., 2012).

Both genetic and non-genetic factors may contribute to variations in the number and function of human immune cells, as well as the concentration of soluble mediators, resulting in considerable heterogeneity in individual immune responses. Recent cohort-based studies have highlighted the effect of both genetic (Brodin et al., 2015; Orrù et al., 2013; Roederer et al., 2015) and non-genetic factors, including cohabitation, chronic infection, aging, and microbiome (Carr et al., 2016; Roederer et al., 2015; Shaw et al., 2013) on the variation of human immune cell levels. However, a comprehensive analysis characterizing the interrelationship between different immune cell types (innate and adaptive) and Ig levels in freshly drawn (non-frozen) human blood as well as the effect of genetic and non-genetic factors on the variation in these immune traits has been lacking.

The Human Functional Genomics Project (HFGP) is an initiative comprising several cohorts of healthy individuals and patients that aims to identify the factors responsible for the variability of immune responses in health and disease (<http://www.humanfunctionalgenomics.org>). While three other studies accompanying this present study describe environmental (ter Horst et al., 2016), genetic (Li et al., 2016), and host microbiome

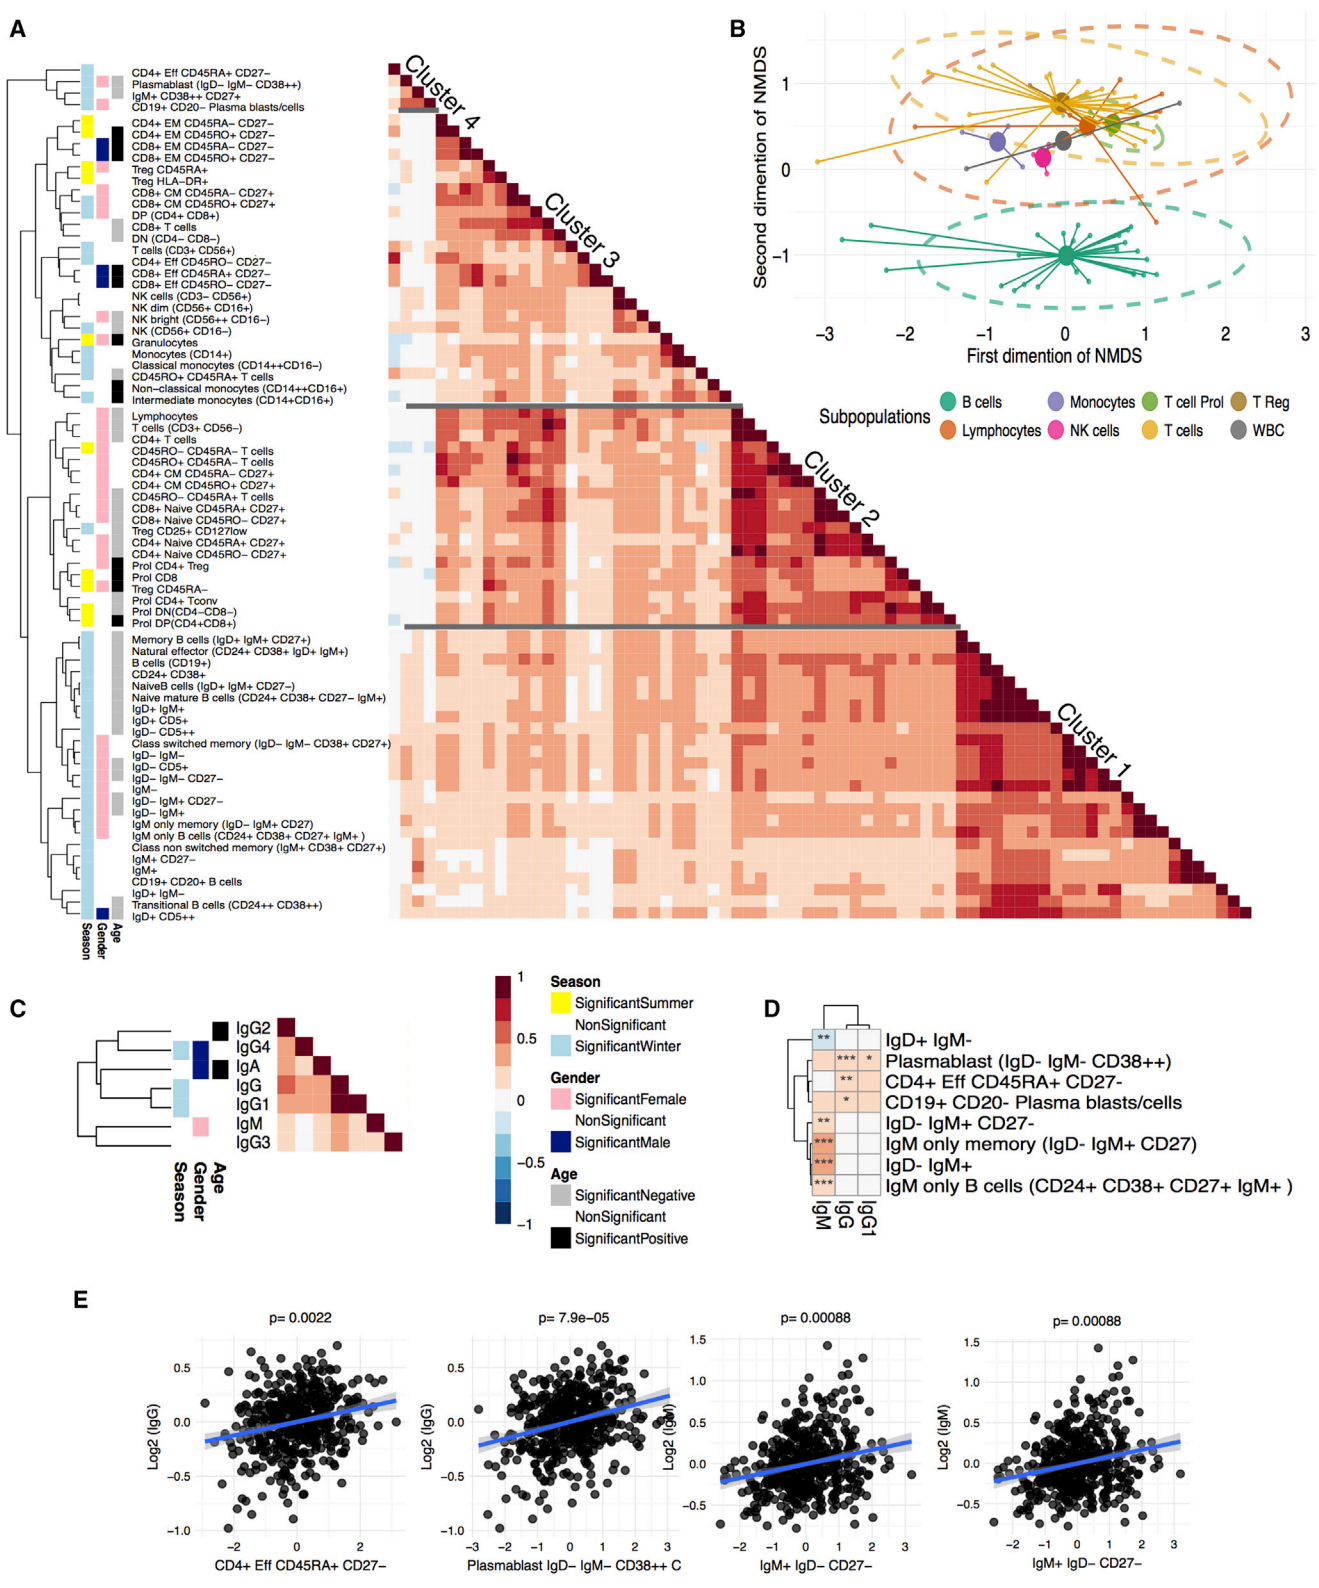

(legend on next page)

(Schirmer et al., 2016) factors that affect pathogen-induced peripheral blood cytokine responses, this study is a comprehensive assessment of the impact of environmental and genetic host factors on circulating cell populations, focusing on both T cells and B cells and including associations of B cells with Ig concentrations. Our results provide a full picture of humoral immunity, as seen in serum Igs, and its interrelationship with immune cell levels.

We analyzed the determinants of variation in T and B cell counts and Ig levels by testing the association between immune traits and non-heritable factors such as age, gender, and season. We estimated the genetic heritability of different immune cells and show that the variation in T cell counts is predominantly (37%) explained by genetic factors, which is in contrast to B cell counts, which are more strongly influenced by the environment. We also tested the effect of genome-wide genetic variation on cell-level variation by using cell-count quantitative trait loci (ccQTL) mapping and identified eight independent genomic loci associated with lymphocyte counts, four of which have not been described before, and with four cell subsets that have not been characterized in previous studies. We also performed an integrative genomics analysis by using RNA-sequencing (RNA-seq) data from blood samples of 628 healthy individuals to identify putative causal genes, including long non-coding RNAs, at ccQTLs that may regulate cell counts. Lastly, we show that the genetics behind ccQTLs partially overlap with the previously described genetics of immune-mediated/related disease.

## RESULTS

### Correlations of Cellular and Humoral Immune Compartments Highlight Factors that Drive Inter-individual Variation

Both the cellular and humoral arms of our immune system are crucial for an effective immune response. However, information on the interrelationship between the cellular and humoral components is scarce. To analyze the underlying patterns of the variation within these immune components at the population level, we performed unsupervised hierarchical clustering within our measured immune cell populations and within Ig levels, after correcting for age, sex, and season effects. For immune cells, we identified four clusters of biological relevance (Figure 1A) in which subpopulations of B cells, T cells, and myeloid immune cells clustered into clusters 1, 2, and 3, respectively. Cluster 4 contains plasma cells and their precursors, as well as plasmablasts, with both groups clustering separately from the B cell cluster (cluster 1). A subpopulation of CD4+CD45RA+CD27–

effector T cells was also present in cluster 4. These observations suggest that plasma cells and CD4+CD45RA+CD27– terminally differentiated effector T cells are co-regulated by similar factors. Moreover, using a nonmetric multi-dimensional scaling approach, we revealed, in a data-driven way, a separation between B cells and the other immune subpopulations at the second dimension (Figure 1B). This suggests that B cells might also be co-regulated independently of the other immune subsets.

The clustering patterns of Ig (sub)classes formed two major clusters, one containing IgM and IgG3 and the other containing IgG, IgG1, IgG4, and IgA (Figure 1C). For the IgM and IgG3 cluster, there is biological evidence associating these two humoral components. They are known to have the strongest complement binding capacity, a function that is required for optimal protection against (intracellular) pathogens (Schroeder and Cavacini, 2010). Interestingly, the regulation of both IgM and IgG3 appears to be controlled by the cytokines interleukin (IL)-4 and transforming growth factor  $\beta$  (TGF- $\beta$ ), indicating functional homogeneity under similar regulatory control (Brüggemann et al., 1987; Coffman et al., 1989; McIntyre et al., 1993; Snapper and Paul, 1987).

Having established the hierarchical clustering of immune cell populations and Ig levels, we analyzed the association between immune cell counts and Ig levels by using Spearman correlation (Figure 1). Out of 511 possible relations, nine significant correlations (false discovery rate [FDR]  $\leq$  0.05) were identified between Ig subclass and immune cell populations (Figure 1C). CD4+ effector T cells (CD45RA+ CD27–), which cluster with the plasma cells and plasmablasts (cluster 4), show a significant correlation with IgG levels ( $r = 0.2$ ,  $p = 8.5e-6$ ) (Figures 1D and 1E). This correlation may partly reflect the connection between these cell types in humans, where effective recall of antibody responses is dependent on T-cell-dependent memory B cell generation (Kurosaki et al., 2015). A significant correlation was also observed between IgM-only B cell levels and IgM serum levels ( $r = 0.24$ ,  $p = 6.3e-8$ ), and a negative correlation was observed between IgM serum levels and IgD+IgM– B cells ( $r = -0.2$ ,  $p = 1.0e-8$ ) (Figures 1C and 1D; Table S1). This correlation between IgM-only B cells in peripheral blood and IgM in serum suggests that high levels of IgM-only B cells predict higher levels of plasma cells in tissue. These results stress the importance of identifying the key factors driving the underlying inter-individual variation in the immune system.

### Effect of Age, Gender, and Season on the Inter-individual Variation of Cellular and Humoral Immune Components

We investigated the distribution of immune cell counts and subset frequencies among  $\sim$ 500 individuals in our cohort (500

#### Figure 1. Interrelationship between Immune-Associated Cell Subpopulations and Immunoglobulin Levels in the General Population

- (A) Unsupervised hierarchical clustering of the correlation within cell subpopulations.  
 (B) A two-dimensional representation of the correlations between each cell type by non-metric multidimensional scale analysis. Small circles represent individual cell types. Large circles represent the calculated centroid of the grouped cell types.  
 (C) Unsupervised clustering of immunoglobulin levels. The color code next to the dendrogram represents any significant association of cell count with age, gender, or season.  
 (D) Heatmap of Spearman correlation coefficients between each independent cell subpopulation and immunoglobulin levels. Stars indicate significance of the correlation after FDR correction. \* $p \leq 0.05$ , \*\* $p \leq 0.005$ , \*\*\* $p \leq 0.0005$ .  
 (E) Examples of cell subpopulations that are significantly associated with immunoglobulin levels. Regression line are included for visualization purposes.

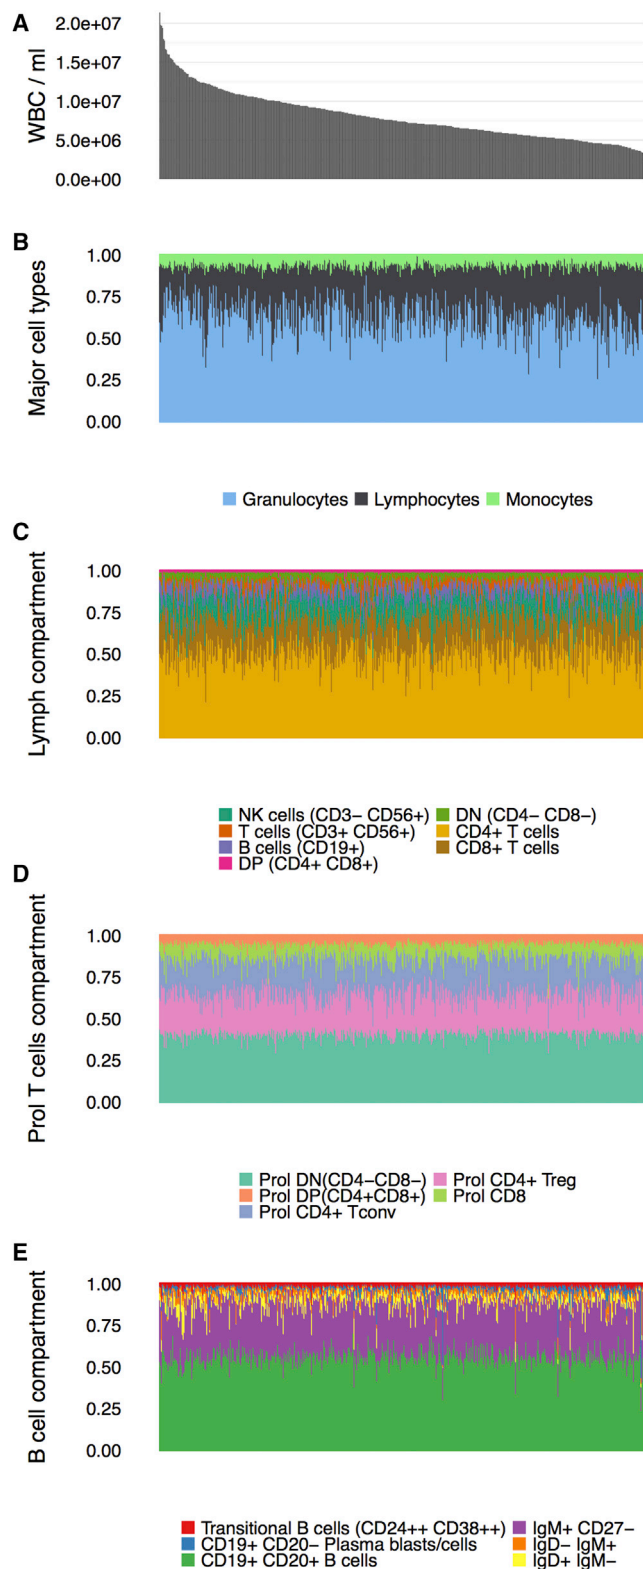

**Figure 2. Variation of Cell Levels and Composition in the Dutch General Population**

(A) Peripheral-blood white blood cell counts per ml blood (y axis) in 516 individuals (500FG cohort) (x axis).

Functional Genomics Project cohort [500FG] from the HGFP). We observed substantial variation in total white blood cell (WBC) counts (Figure 2A) and the levels of the lymphoid and myeloid cell populations (Figures 2B and 2E) between individuals. We then systematically tested the association of this variation with age, gender, and season.

### Age Is Associated with Reduced Lymphoid but Increased Myeloid Cell Levels

Aging plays a major role in shaping the immune profile (LeMaout et al., 1997; Shaw et al., 2013; Solana et al., 2006). Using Spearman correlation, we observed consistent correlation with age (64% of the cell subpopulations studied are significantly correlated), both negative and positive. Aging was significantly associated (FDR  $\leq$  0.05, corrected for 73 tests) with a decrease in lymphoid immune cell levels (naive T cells, B cell subsets) and with a concomitant increase in myeloid immune cell levels of granulocytes, pro-inflammatory non-conventional monocytes (CD14<sup>++</sup>CD16<sup>+</sup>), and intermediate monocytes (CD14<sup>+</sup>CD16<sup>+</sup>) and levels of proliferating CD4<sup>+</sup> regulatory T cells (Tregs) (Figure 3A; Table S2). To show the robustness of age effect on immune traits, we used a resampling. We randomly selected 90% of all the samples and tested for age effect on immune traits. We iterated this 100 times and observed that 91% of traits showed consistent results when compared with the original full dataset in more than 70% of the sampling iterations (Figure S1). We also compared the variation within cell counts in younger subjects (lower quartile of age distribution in the 500FG cohort; median age = 19 years) versus older subjects (upper quartile; median age = 65 years). We observed significant differences ( $p \leq$  0.05) in the variations of CD4<sup>+</sup> (CD45RA<sup>-</sup>CD27<sup>+</sup>) effector T cell, NK cell (CD56<sup>+</sup>CD16<sup>-</sup>), and CD3<sup>+</sup>CD56<sup>+</sup> T cell subpopulations (Figure S2A). Upon testing of associations between age and Ig levels, only IgG2 and IgA levels showed a significant positive correlation age (FDR  $\leq$  0.05, corrected for seven tests). These observations support the hypothesis that immune response shifts class in elderly individuals with de novo infections, with a restricted adaptive response being replaced by an innate type of immunity (Le Garff-Tavernier et al., 2010; Hazeldine et al., 2012; LeMaout et al., 1997; Solana et al., 2006).

### Gender Is Associated with Different B Cell Subsets and Ig Levels

We observed a significant increase (FDR  $\leq$  0.05) in mature B cell subsets, IgM-only B cells, plasmablast B cells, proliferating and memory (CD45RA<sup>-</sup>) Treg cells, NK cell subsets, and IgM serum levels in women as compared to men (Figure 3B; Table S2). The significant association between higher levels of IgM-only B cells ( $p = 0.0005$ ) and increased serum IgM levels ( $p = 0.0002$ ) in women highlights the functional link between the cell type and its product (Amadori et al., 1995). By using the resampling approach, we observe that 87% of traits show consistent results when compared with the original full dataset in more than 70% of

(B–E) Relative cell proportions (y axis) of monocytes, lymphocytes and neutrophils (B), the lymphoid subpopulations (C), proliferating T cell subsets (D), and B cell subsets (E). Samples are presented in the exact same order in each figure.

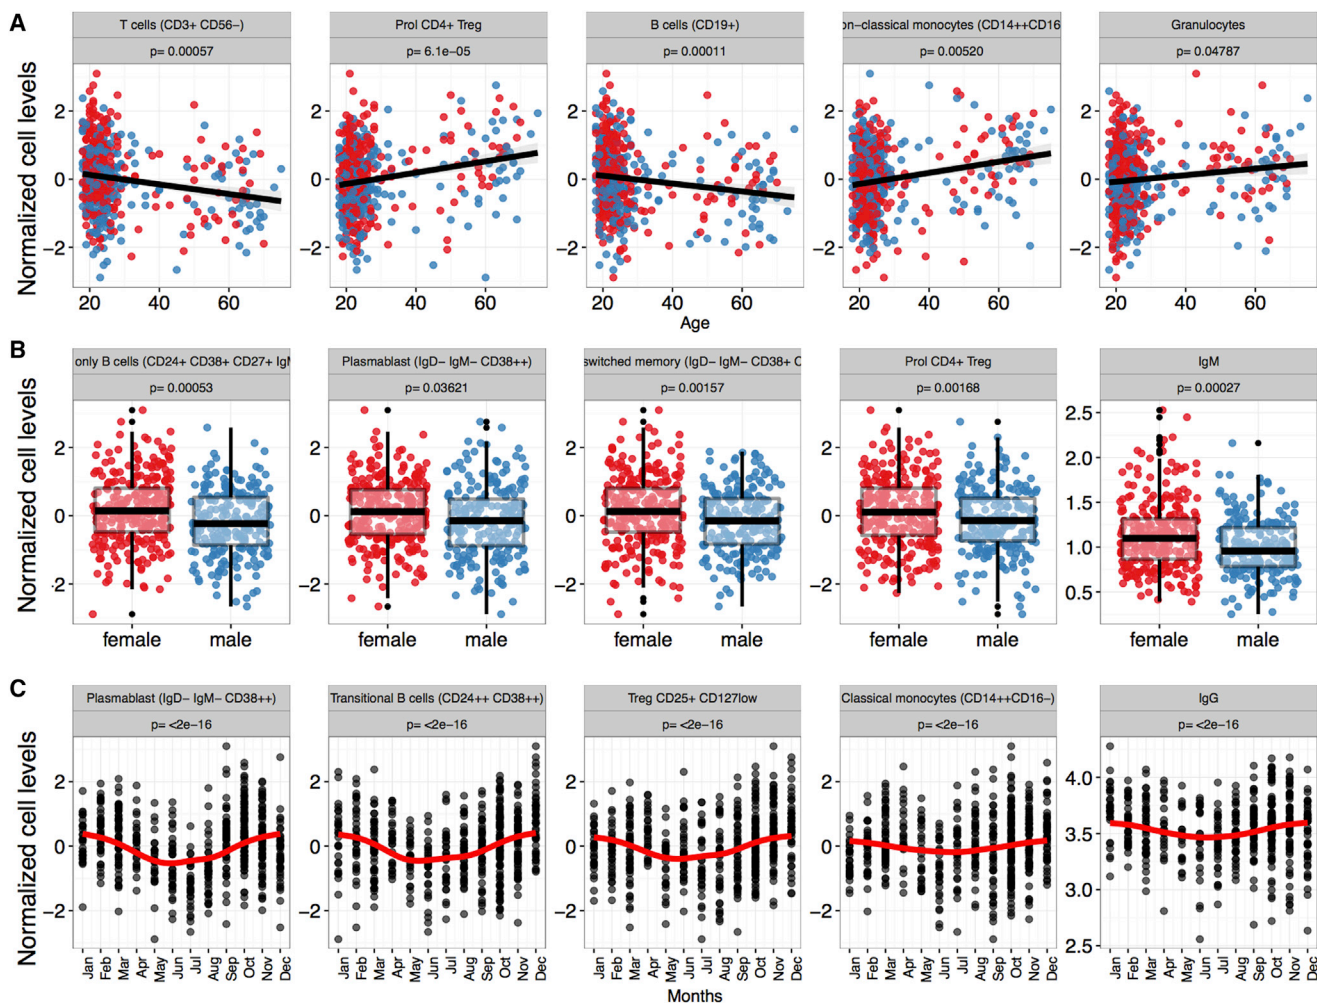

**Figure 3. Age, Gender, and Season Are Modulators of the Immune Traits**

Examples of significant associations ( $FDR \leq 0.05$ ) between age (A), gender (B), or season (C) and cell counts or immunoglobulin levels.

the iterations (Figure S1). In men, we observed an increased level of effector and effector memory T cells (Figure S2C) and a reduced level of IgG4 and IgA with nominal  $p$  values  $< 0.01$  (see also ter Horst et al.)

Because we observed a significant effect of gender on different B cell and Ig levels, we investigated whether this effect was due to a difference in gender-associated hormone levels. We first tested whether the immune cell counts correlated with hormone levels in the 500FG cohort, but found no statistically significant correlation (Figure S2B). As expected, we observed lower testosterone concentrations in women than in men (Figure S2C). Although testosterone has been shown to inhibit Ig levels of human peripheral-blood mononuclear cells in vitro (Kanda et al., 1996), our analysis indicates that higher testosterone levels in women are significantly associated with increased IgG levels. Moreover, we observed a significant association of hydroxyprogesterone with IgG levels in women (Figure S2C). Hydroxyprogesterone levels vary with menstrual cycle, being highest in the luteal phase and lowest prior to

ovulation. In men, this hormone showed less variation in serum levels.

### Seasonal Variation Affects Both Cellular and Humoral Responses

We found a consistent seasonal effect on immune cell subpopulations, with 67% of the measured cell types showing a significant association with season ( $FDR \leq 0.05$ ). B cell subsets were the most consistently affected, with all B cell subpopulations showing significantly higher levels in winter. Treg, NK(T), and classical monocytes (CD14++CD16-) were also significantly higher in winter, while granulocytes, proliferating CD8+ T cells and CD4+ effector memory cells showed a higher peak during the summer months (Figure 3C; Table S2). IgG, IgG1, and IgG4 levels were also higher in winter, with nominal  $p$  values  $< 0.01$  (see also ter Horst et al., 2016). By using the re-sampling approach, we observed that 94% of traits show consistent results when compared with the original full dataset in more than 70% of the iterations (Figure S1). Altogether, these results point to an important role for environmental factors that

vary with season (e.g., allergies and viral infections) in the regulation of the magnitude of both the cellular and the humoral immune response (Dopico et al., 2015).

### Genetic Factors Explain a Large Proportion of the Variation in Immune Traits

We observed that cell counts show high variability across individuals and that this variation could be partially ascribed to age-, gender-, or season-related factors. To further explore this inter-individual variation, we estimated the proportion of variance explained by genome-wide SNPs for each of 73 independent cell types after controlling for age, gender, and seasonal variation. As shown in Figure 4A and Figure S3, the majority of immune cell population variation is explained by non-heritable rather than heritable influences. The proportion of immune cell variation that was explained by genetics varies for each cell subpopulation. It was significantly higher for the 29 T cell immune traits as compared to the 27 B cell immune traits (median of 30% versus 18%, respectively; Student's t test,  $p \leq 0.05$ ). Effector memory and effector CD4+ and CD8+ and CD4+ Tregs were also strongly influenced by genetic factors (Figure S3). The seemingly interdependent IgD+IgM+ and IgD+IgM− B cell populations showed completely opposing heritability estimates (Figure S3), likely reflecting the heterogeneity of the IgD+IgM+ population, which consists of both T-cell-dependent naive CD27− B cells and presumed T-cell-independent CD27+ memory B cells (Weller et al., 2004). Within the innate leucocytes, more than 50% of the variance in transitional monocytes (CD14+ CD16+), NK cells (CD3−CD56+), and NK-bright cells (CD56++CD16−) was explained by genetic variation. There is little contribution of genetics to the variation of granulocyte levels. Notably, 50% ( $\pm 20\%$ ) of the variance in IgM can be explained using genotype information. For the remaining Igs, we did not identify any contribution of genetics to the variance (Figure S3).

### Mapping of QTLs in the 500FG Cohort Identifies Eight Cell Count QTLs

To identify the genetic variants determining cell counts and Ig levels, we mapped ccQTL and Ig level QTLs (IgQTLs) using genome-wide SNP genotype data. After controlling for the effect of age, gender, and season, we identified eight independent genome-wide significant ccQTLs specific for three cell types: T cells (five ccQTLs), B cells (two ccQTLs), and NK cells (one ccQTL) (Figures 4B and 4C; Table 1 and Table S3). Four of these ccQTLs have been reported before (Table 1, Figures 4A–4D), providing validation for our analytical approach (Orrù et al., 2013; Roederer et al., 2015). The other four ccQTLs have not previously been associated to immune traits. One of these B cell ccQTL SNPs was also associated to Ig levels, although not at genome-wide significance (rs62433089,  $p < 5e-8$ ) (Figure S4F). The higher numbers of T cell ccQTLs compared to B cell ccQTLs, when combined with our finding that a greater proportion of the variance in T cells (but not B cells) can be explained by genetics, would suggest a stronger genetic component for T cell immunity when compared to B cells. Furthermore, we also found that the IgG1 level is suggestively associated with a B-cell-specific ccQTL (rs10277809,  $p \leq 0.001$ ), implying a shared regulation of B cell and certain Ig levels in blood.

### The MYO1B Locus on Chromosome 7 Is Associated with B Cell Levels

We found a B-cell-specific ccQTL (rs10277809, chromosome 7) (Figures 4B and 4C; Table 1) that showed a genome-wide significant association with three B cell subpopulations (CD24dim CD38dim, IgM+–only, and IgM–only memory IgD− IgM+ CD27+ B cells) (Figures 5A and 5B). To explore the biological role of the MYO1B locus, we mapped expression QTLs (eQTLs) by using RNA-seq data from peripheral-blood cells of 629 healthy individuals from the Lifelines Deep (LLDeep) cohort (Tigchelaar et al., 2015). We observed that SNP rs10277809 affects the expression levels of both lncRNA RP4-647J21 and the MYO1G protein-coding gene (Figure 5C). This further supports our finding that this ccQTL is associated with the abundance of peripheral B cell subsets in human peripheral blood. Co-expression analysis and pathway predictions using over 10,000 RNA-seq samples collected from public databases (Fehrmann et al., 2015) show a significant enrichment of B-cell-related functions for both MYO1G and RP4-647J21 (Figure 5D).

### PDE4A Locus on Chromosome 19 Affects T Cell Levels

We found a T-cell-specific ccQTL, rs280499 on chromosome 19, that (Figures 4B and 4C; Table 1) particularly associated with CD8+ CM CD45RO+ CD27+ cells (Figures 5E and 5F). We then mapped cis-eQTLs for SNP rs280499 and found its effect on expression levels of PDE4A (Figure 5G). PDE4A encodes the protein phosphodiesterase 4A and has been implicated in T cell differentiation (Peter et al., 2007). PDE4A hydrolyses cyclic AMP, which modulates a variety of cellular responses to extracellular stimuli, including regulating lymphocyte proliferation and the biosynthesis of IL-2. Because PDE4A plays a role in inflammatory processes, it is therapeutically targeted in the treatment of a number of immune-mediated diseases (Mazur et al., 2015).

### Shared Genetics between Immune Traits and Immune-Mediated Diseases

Three out of our eight ccQTLs have been previously associated with immune-mediated diseases (Table 1). In particular, rs1801274, which is a ccQTL for multiple cell types, is associated with several auto-immune diseases (Table 1; Figure S4A), including ulcerative colitis and Kawasaki disease, and has also been replicated in previous studies (Orrù et al., 2013; Roederer et al., 2015). On chromosome 19, the SNP rs2164983 associated to NK cells (Table 1) has been previously reported to be a risk factor for atopic dermatitis (Paternoster et al., 2011). Furthermore, ccQTL rs280499 overlaps with ImmunoBase regions associated with immune-mediated diseases such as multiple sclerosis and rheumatoid arthritis (<https://immunobase.org/studies/>). In addition, we make use of ccQTLs and IgQTLs at a suggestive significance threshold ( $p < 1e-5$ ) and genome-wide association study (GWAS) catalog SNPs known to influence susceptibility to various diseases (Figure 6). Interestingly, SNPs that affect T cells levels are also enriched for SNPs associated to auto-immune and inflammatory diseases. In contrast, ccQTLs that affect B cells are enriched for SNPs associated with allergy-related diseases (Figure 6).

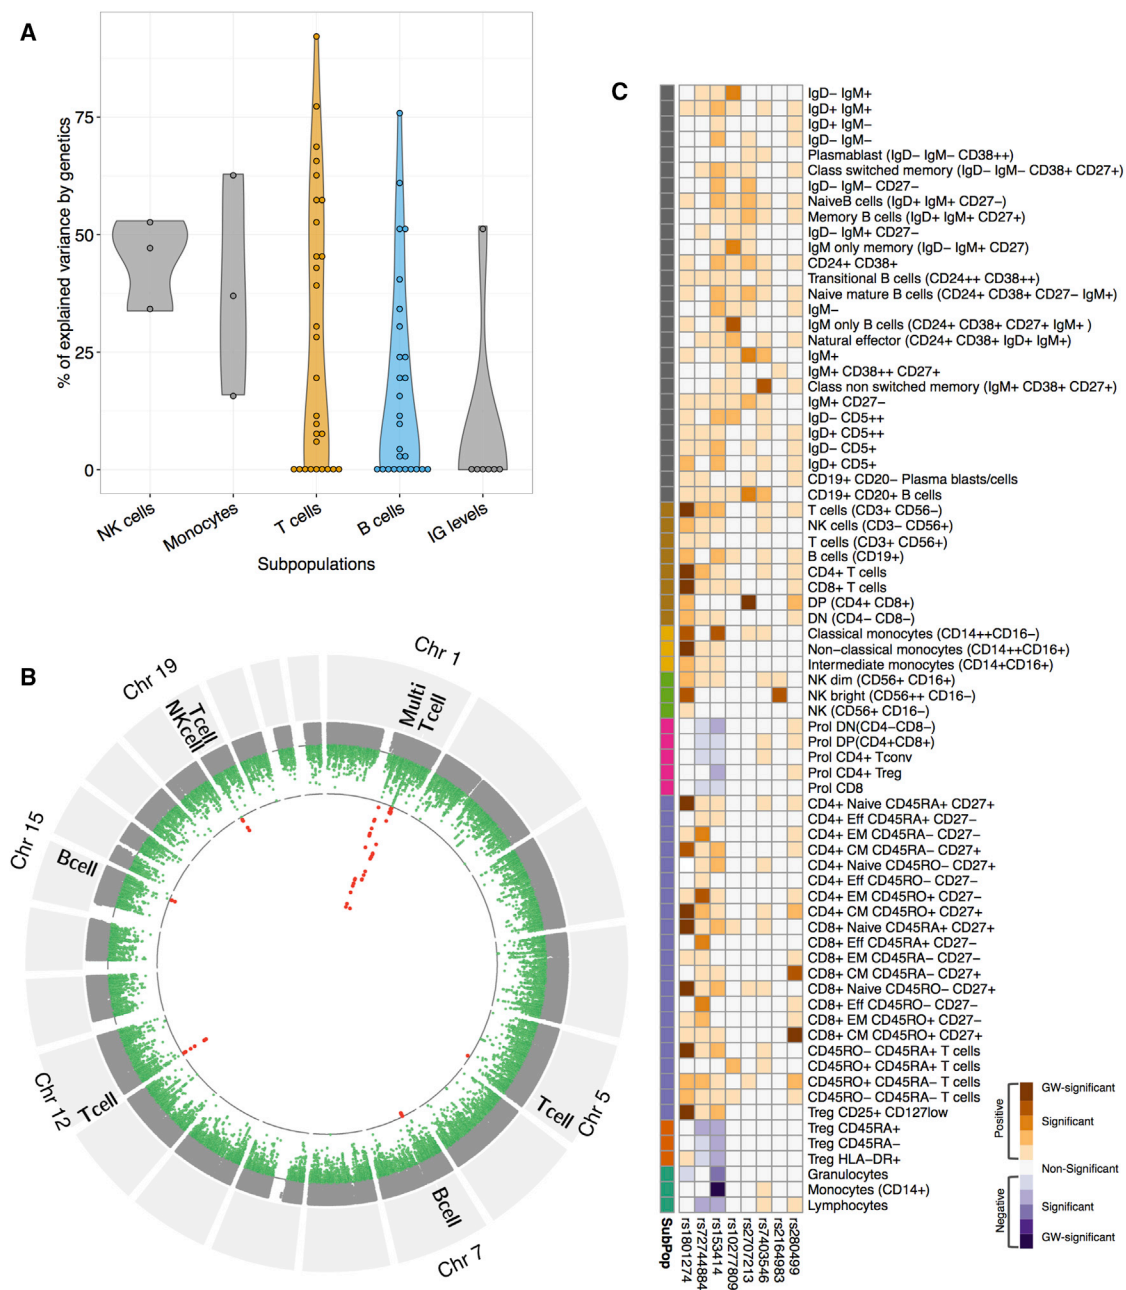

**Figure 4. The Genetics of Cell Counts and Immunoglobulin Level Variation in a General Population**

(A) Violin plot representing the distribution of the percentage of variance explained by genetics for the immune traits. A total of 29 T cell subsets versus 27 B cell subsets were analyzed (mean percentages of variance explained by genetics of 29.5 versus 17.7, respectively; Student's t test,  $p \leq 0.05$ ).

(B) Combined Manhattan plot of all cell types. Red dots mark genome-wide significant associations ( $p \leq 5e-10$ ). Immune cell types with the strongest association are indicated.

(C) Overview of the association of multiple genomic loci (ccQLTs) and immune cell types. Darkest colors indicate genome-wide significant ccQLTs, while divergence represents the direction of ccQLT effect.

## DISCUSSION

The HFGP project was initiated to better understand the variation of the immune landscape of human beings and to identify targets for personalized treatment interventions. To explore the

determinants of variation in T and B lymphocytes and Ig levels, we tested the association between these immune traits and both heritable factors and non-heritable factors, such as age, gender, and seasonality, in the HFGP 500FG cohort of healthy volunteers.



**Table 1. List of Eight Independent Genome-wide Significant Cell Count QTLs**

| SNP        | Chr. | Base-Pair Position | ccQTL p Value <sup>a</sup> | Cell Type Name                               | No. <sup>b</sup> | Type       | Replicated in                                                              | Candidate Gene <sup>c</sup>                                                 | Functional Annotation | Disease SNPs                          |
|------------|------|--------------------|----------------------------|----------------------------------------------|------------------|------------|----------------------------------------------------------------------------|-----------------------------------------------------------------------------|-----------------------|---------------------------------------|
| rs1801274  | 1    | 161479745          | 5.60e−25                   | CD4+ naive CD45RO− CD27+                     | 20               | 16/T cells | <a href="#">Roederer et al., 2015</a><br><a href="#">Orrù et al., 2013</a> | <i>FCGR2A</i> <sup>d</sup><br><i>HSPA7</i> <sup>d</sup>                     | missense              | KD, UC, SLE, IBD                      |
| rs72744884 | 2    | 241782823          | 2.20e−9                    | CD4+ EM CD45RO+ CD27−                        | 1                | T cell     | –                                                                          | <i>KIF1A</i>                                                                | –                     | –                                     |
| rs153414   | 5    | 153748732          | 3.60e−8                    | CD4+ T cells                                 | 4                | T cell     | <a href="#">Roederer et al., 2015</a>                                      | <i>GALNT10</i> <sup>d</sup>                                                 | intronic              | –                                     |
| rs10277809 | 7    | 44948953           | 2.80e−8                    | IgM-only B cells (CD24+ CD38+ CD27+ IgM+)    | 2                | B cell     | –                                                                          | <i>RP4-647J21</i> <sup>d</sup><br><i>MYO1G</i><br><i>ZMIZ2</i> <sup>d</sup> | –                     | –                                     |
| rs2707213  | 12   | 6899181            | 1.30e−9                    | DP (CD4+ CD8+)                               | 3                | T cell     | <a href="#">Orrù et al., 2013</a>                                          | <i>CD4</i> <sup>d</sup>                                                     | intronic              | –                                     |
| rs7403546  | 15   | 87871288           | 2.30e−8                    | class non-switched memory (IgM+ CD38+ CD27+) | 1                | B cell     | –                                                                          | <i>AGBL1</i>                                                                | –                     | –                                     |
| rs2164983  | 19   | 8789381            | 2.70e−8                    | NK bright (CD56++ CD16−)                     | 2                | NK         | <a href="#">Roederer et al., 2015</a>                                      | <i>ACTL9</i>                                                                | –                     | AD                                    |
| rs280499   | 19   | 10489606           | 5.70e−9                    | CD8+ CM CD45RO+ CD27+                        | 2                | T cell     | –                                                                          | <i>PDE4A</i> <sup>d</sup>                                                   | –                     | MS, CD, T1D, RA, UC, IBD <sup>e</sup> |

Abbreviations are as follows: EM, effector memory; KD, Kawasaki disease; UC, ulcerative colitis; SLE, systemic lupus erythematosus; IBD, inflammatory bowel disease; AD, atopic dermatitis; MS, multiple sclerosis; CD, Crohn's disease; T1D, type 1 diabetes; RA, rheumatoid arthritis; JIA, juvenile idiopathic arthritis.

<sup>a</sup>p value from a linear regression model after correcting for age, gender, and month of collection.

<sup>b</sup>The number of additional cell subpopulations showing a nominal p value  $\leq 1 \times 10^{-6}$  at this SNP.

<sup>c</sup>Predicted candidate genes based on eQTL analysis and/or close proximity with the ccQTL.

<sup>d</sup>Genes with significant *cis*-eQTL based on ~600 RNA-seq samples from peripheral blood.

<sup>e</sup>Overlapping with ImmunoBase curated regions.

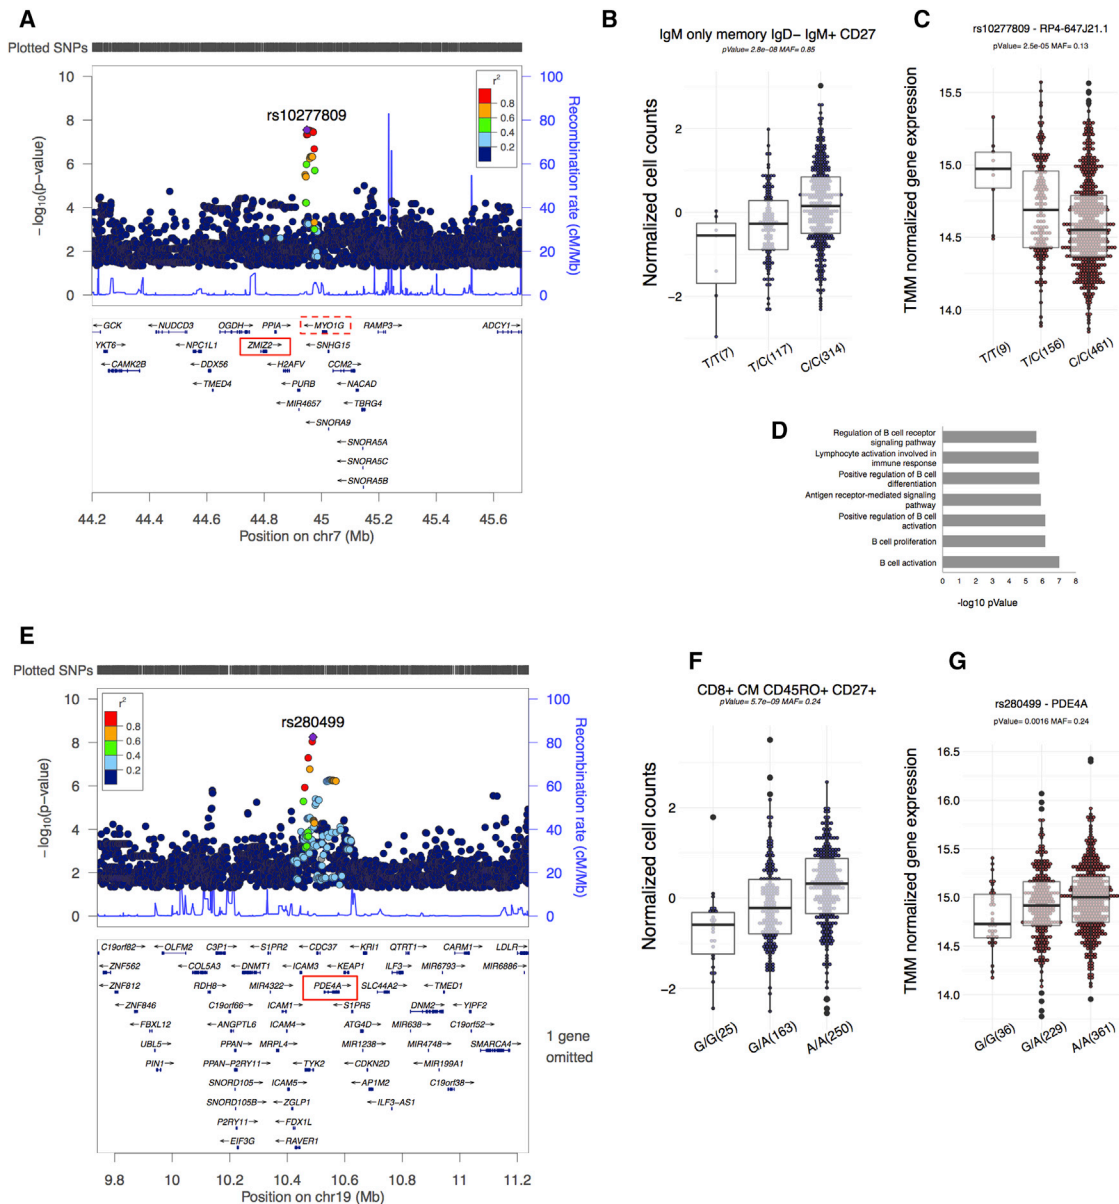

**Figure 5. ccQTLs Associated with B and T Cell Subpopulations in Healthy Volunteers**

(A) Locus zoom plot showing a B-cell-specific ccQTL in chromosome 7. Red boxes in the gene area denote a significant eQTL effect (nominal p value  $\leq 0.05$ ) using  $\sim 600$  RNA-seq samples from an independent Dutch LLDeep cohort.

(B) Box-plot of the top associated B cell subpopulation (IgM-only memory IgD<sup>-</sup> IgM<sup>+</sup> CD27) with the genotype.

(C) eQTL box-plot of the lncRNA RP4-647J2.1, which shows a high co-expression pattern with *MYO1G*, dotted red box in (A).

(D) Gene ontology enrichment analysis of co-expression genes using publicly available RNA-seq data ( $\sim 10,000$ ) indicates that candidate gene RP4-647J21 is involved in the regulation of B cell activation.

(E) Locus zoom plot showing a T-cell-specific ccQTL in chromosome 19. Red box marks the gene with a significant eQTL effect using the LLDeep cohort RNA-seq data ( $\sim 600$  samples).

(F) ccQTL boxplot of the top associated T cell subpopulation (CD8<sup>+</sup> CM CD45RO<sup>+</sup> CD27<sup>+</sup>).

(G) Box-plot of *cis*-eQTL of *PDE4A* using the LLDeep cohort RNA-seq data.

The abundance of circulating T cells appears to be influenced more by genetics than the numbers of circulating B cells. This hypothesis is based on our observation that a higher percentage of variation is explained by genetics for T cells ( $\sim 30\%$ ) than for B

cells ( $< \sim 18\%$ ) and on our identification of five T cell ccQTLs versus only two B cell ccQTLs. Most B cell subsets (and Ig levels) consistently showed seasonality effects, peaking during winter, suggesting that environmental factors might be more important

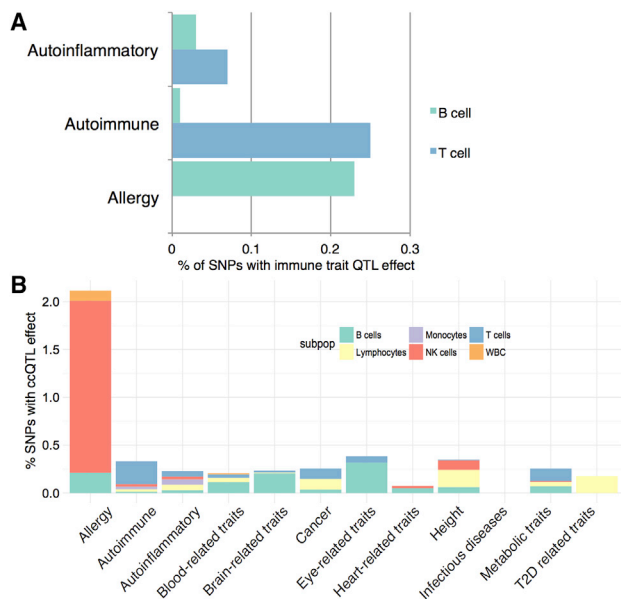

**Figure 6. Association of ccQTLs with Disease**

(A) The percentage of auto-inflammatory-disease-, autoimmune-disease-, and allergy-associated SNPs with B cell and T cell count QTLs ( $p \leq 1E-05$ ). (B) The percentage of disease-associated SNPs with cell count QTLs ( $p \leq 1E-05$ ).

in driving B cell count variation. This hypothesis is supported by results of multi-dimensional scaling analysis, revealing a separation between B cells and other immune cell subpopulations.

Despite the impact of environmental cues on B cell counts, B cell function is still affected by genetics. Moreover, only one type of Ig showed a significant genetic component to its variation: ~50% of the proportion of variance in IgM levels was explained by genetics, while none of the other Igs we measured showed any genetic component. We also identified an IgM-specific QTL but didn't find QTLs for any of the other Igs that we investigated. Both the IgM QTL and the ccQTL associated to IgM-only B cells, and this may be representative for that part of the B cell response that has innate-like features, such as the production of natural antibodies by dedicated B cell types. In contrast, the adaptive B cell response, featuring receptor editing and affinity maturation, might be under more stringent environmental control, as previously reported in a study of the seasonal pathogen influenza (Baumgarth et al., 1999).

Non-genetic factors such as age and gender have extensively been associated with changes in immune profiles. Fluctuating gender-associated hormone levels and the accumulation of environmental factors, such as an increasing infection burden with age, both leave a strong imprint on the nature and dynamics of the immune response (LeMaout et al., 1997; Shaw et al., 2013; Solana et al., 2006). Notably, our results appear to support the hypothesis that aging is associated with an overall decrease in lymphoid immune cell levels and an increase in myeloid cell types, as well as increased Treg activity. This suggests that immune response type and regulation is altered toward a more innate-type of immunity with age, as previously reported (Le

Garff-Tavernier et al., 2010; Hazeldine et al., 2012). In our current study, we replicate a number of previously reported age-related changes in the human immune system, such as depletion of naive B cells and T cells and a concomitant increase of memory B and T cells (LeMaout et al., 1997; Shaw et al., 2013; Solana et al., 2006). We also identify age-related changes in specific cell subsets, such as monocyte subclasses, granulocytes, and proliferating T cell populations, that were not reported before.

With regard to gender, we see overall higher immune cell counts and Ig levels for women, with the notable exception of effector/memory T cells, which are more abundant in men. The significant correlation we observed between the higher levels of IgM-only B cells and increased serum levels of IgM in women could be explained by the functional link between these cell types and overall serum Ig levels in humans (Amadori et al., 1995). The enhanced antibody responses found in women upon vaccination fits this profile (Butterworth et al., 1967; Rowley and Mackay, 1969), as does the previously established positive correlation between estrogens and IgM and IgG levels (Kanda and Tamaki, 1999).

The generation of heterogeneous human memory T cell subsets, and how they develop upon activation of naive T cells, is a subject of intense research (Farber et al., 2014). Two developmental models have been proposed. Either (1) memory T cells arise directly from effector cells or (2) naive cells develop directly into memory cells without effector stage transition (Restifo and Gattinoni, 2013). In our unsupervised approach to study the inter-relationship between cell types, we observed that naive and central memory T cells co-cluster within the T cell cluster, while effector and effector memory T cells co-cluster with innate effector cells. Although we weren't able to decipher the developmental route of these T cell maturation stages, this differential clustering of more quiescent naive and central memory T cells versus innate effector-like effector and effector memory T cells suggests clustering based on function. Meanwhile, the cluster composed of plasmablast B cells also grouped the T helper cytokine (Th2) subpopulation, and these two subpopulations of immune cells have previously been functionally linked given that they are increased in patients with IgG4-related disease (Akiyama et al., 2015). Unfortunately, we weren't able to find any significant association between IgG4 levels and plasmablast or Th2 T cells within the general population.

The generation and isotype switching of Ig-producing plasma cells can be mediated in either a T-cell-dependent or a T-cell-independent fashion. We found that CD4+ effector T cells (CD27- CD45RA+) show a strong association with IgG levels, implying a functional link between these cell types in humans, which is in line with the finding that effective recall of antibody responses requires the generation of memory B cells controlled by T cell subsets (Kurosaki et al., 2015). We found a significant positive correlation between IgM-only B cell counts and IgM serum levels and a negative correlation between IgM serum levels and IgD+IgM- B cells. IgM-only peripheral-blood lymphocytes are non-activated resting B cells that resemble classical, class-switched memory B cells and express higher levels of mRNA than naive B cells (Klein et al., 1997). Whether this increase in transcription contributes to higher serum Ig levels is still unclear.

The proportion of variance explained by genetics per subpopulation can be quite variable. NK cells display the highest percentage of variance explained by genetics. A similar positive impact of genetics on NK cells was described previously (Roederer et al., 2015). With respect to the effector memory and effector T cells, high levels of variance explained by genetics are in agreement with recent findings in twins (Brodin et al., 2015). We also observed a genetic contribution to Treg counts, which is in contrast to the study by Brodin et al. (2015). For the majority of B cell subsets, with the exception of IgD+ IgM– and transitional B cells, the variance in cell counts explained by genetics was low (median < 18%). This result could suggest that B cell immunity is more susceptible to environmental cues, which is further exemplified by a prominent seasonal effect on both B cell counts and Ig levels. Additionally, in a recent vaccination cohort study, it was discovered that the inter- and intra-individual variations in immune response before and after vaccination can be influenced by age and gender, which also corroborates our findings (Frasca et al., 2012; Tsang et al., 2014).

Identifying ccQTLs associated with genomic regions of relevance to disease provides insight into disease etiology. We identified eight ccQTLs, four of which were not reported before. Those specific B cell subpopulations (which had a ccQTL effect) have not been studied before in the context of the general population. A multi-omics approach combining cell count data, genomics, and transcriptomics was applied to identify the functional and clinical relevance of the ccQTLs. Given the comprehensive analysis of B cell subpopulations, we identified eQTL-effects on *MYO1G* expression and on the expression of a neighboring lncRNA. *MYO1G* has previously been implicated in B cell biology and blood cell numbers in a mouse model (Maravillas-Montero et al., 2014). Together, these results suggest the involvement of *MYO1G* in the active regulation of B cell levels in humans. The lncRNA might or may not be involved in regulation of *MYO1G* expression (Quinn and Chang, 2016). Furthermore, we identified a T-cell-specific ccQTL in the *PDE4A* locus that modulates its expression. The fact that *PDE4A* is a common therapeutic target for immune-mediated diseases (Mazur et al., 2015) further supports an immune-associated role for our ccQTLs.

There are some drawbacks to the approach that we have used for our current study. A limitation of our and similar studies (Brodin et al., 2015; Carr et al., 2016; Orrù et al., 2013; Roederer et al., 2015) is that circulating immune cells are used and do not represent the full landscape of human immunity. Strong differences in immune cell composition have been reported between human peripheral blood, bone marrow, spleen, and lymph nodes (Peters et al., 2013). However, obtaining samples of lymphoid organs in a cohort of healthy individuals is not feasible for ethical and practical reasons. Moreover, given the sample size of our study, the standard error on the calculation of percentage of explained variance by genetics per trait can be substantial (Yang et al., 2010). Finally, in this study we were unable to set a discovery-replication scheme for the immune trait QTL mapping due to the limited sample size. Despite these drawbacks, we were able to identify a differential contribution of genetic versus environmental factors on lymphocyte subpopulations, we confirmed previously reported ccQTLs, and we identified ccQTLs for B cell and T cell subpopulations.

In conclusion, we assessed the influence of genetics, age, gender, and seasonality on cell count variation, Ig levels, and their interrelationship in healthy volunteers participating in the HFPG. Our findings indicate that T cell immunity has a stronger genetic imprint than B cell immunity, while the latter might be driven by environmental factors. We also found eight genome-wide significant loci associated to cell levels, four of which were not reported previously. Moreover, we were able to link immune cell count QTLs to GWAS SNPs associated with immune-mediated diseases. Within the HFPG 500FG cohort, three complementary studies focus on a broader understanding of the variability in human cytokine responses. ter Horst et al. (2016) identified host and environmental factors that contribute to variation of cytokine responses, while Li et al. (2016) and Schirmer et al. (2016) mapped 17 new genetic variants and microbiome factors, respectively, that explain variability of cytokine responses (Li et al., 2016; Schirmer et al., 2016). Like immune cell counts and Ig levels, cytokine responses were influenced by age and gender (ter Horst et al., 2016), and cytokine responses also revealed annual seasonal dependencies (ter Horst et al., 2016). Together, these different HFPG 500FG studies provide important resources for understanding the human immune response. Future studies using the HFPG cohorts will focus on assessing the effect of other factors (e.g., microbiome, infection, and immune-mediated inflammatory disease) on the variation of immune cell counts and function. These studies will contribute to the goal of precision medicine in infections and inflammation by allowing for more accurate predictions of disease status and better treatment efficacy.

## EXPERIMENTAL PROCEDURES

### Ethics Statement

The HFPG study was approved by the ethical committee of Radboud University Nijmegen (no. 42561.091.12). Experiments were conducted according to the principles expressed in the Declaration of Helsinki. Samples of venous blood were drawn after informed consent was obtained.

### Population Cohorts

The study was performed in a cohort of 516 healthy individuals of Western-European ancestry from the HFPG (500FG; for inclusion criteria and further description see <http://www.humanfunctionalgenomics.org>).

### Analysis of Immune Cell Composition and Humoral Components in a Healthy Dutch Population

We measured myeloid and lymphoid immune cell levels by 10-color flow cytometry (Table S4) and serum Ig (sIg) concentrations by fluorescence enzyme immunoassay (Immunocap) in 516 Dutch individuals of Western-European descent, aged 18 to 75 years, recruited over the years 2013–2014 as part of the 500FG study within the HFPG (<http://www.humanfunctionalgenomics.org>). We focused on a set of 73 manually annotated immune cell subpopulations and seven different classes of Igs (Figure S5). To minimize biological variability, cells were processed immediately after blood sampling and typically analyzed within 2–3 hr. Cell populations were gated manually (see Supplemental Experimental Procedures for details).

### Flow Cytometry and Data Analysis

Cells were analyzed within 2–3 hr after sample collection on a 10-color Navios flow cytometer (Beckman Coulter) equipped with three solid-state lasers (488 nm, 638 nm, and 405 nm). Calibration of the machine was performed once a week, and little adjustment to the machine setting had to be made during the inclusion period of the study. Data were then analyzed using Kaluza

software version 1.3 (Beckman Coulter). The hierarchical gating strategy is illustrated in [Figures S6 and S7](#). See [Supplemental Experimental Procedures](#) for details on cell processing, reagents, gating, and analysis.

### Serum Ig and Hormone Levels

See [Supplemental Experimental Procedures](#).

### Genotyping, Quality Control, and Imputation

Volunteers from the 500FG cohort were genotyped using the Illumina Human OmniExpress Exome-8 v1.0 SNP chip. The genotype was called with Optical 0.7.0 using the default settings, excluding samples with a call rate  $\leq 0.99$ . Variants with Hardy-Weinberg equilibrium (HWE)  $\leq 0.0001$ , call rate  $\leq 0.99$ , and minor-allele frequency (MAF)  $\leq 0.001$  were also filtered out. Ethnic outliers were identified by multi-dimensional scaling plots of samples merged with 1000 Genome data and excluded from further analysis. A total of 482 samples and 518,980 variants passed quality control. For further imputation of this dataset, we aligned the strands and variant identifiers to the reference Genome of the Netherlands (GoNL) dataset using Genotype Harmonizer. The phasing was performed with SHAPEIT2 version 2 with the GoNL as a reference panel. Finally, the data were imputed using IMPUTE2 with the GoNL as the reference panel. Only imputed variants with a quality score  $\geq 0.8$  were used for further cell count quantitative loci mapping.

### Statistical Analysis

All statistical analysis were performed using the statistical programming language R (R Core Team, 2012). Cell counts were normalized using an inverse rank transformation (IRT) algorithm, shown in [Table S5](#). Ig levels were normalized using a log<sub>2</sub> transformation. To properly ascertain cell count correlations, we first corrected the normalized cell counts for age, gender, and seasonal effects using a linear model. Associations were then calculated using the normalized and corrected cell counts via Spearman correlation analysis and clustered using these coefficients as distance by an unsupervised hierarchical clustering approach. The same methodology was applied to calculate the association between cell counts and Igs. Significance was declared after multiple testing correction (FDR  $\leq 0.05$ ) (Benjamini and Hochberg, 1995). The Euclidean distances used on the multi-dimensional scaling between cell types were obtained based on the Spearman coefficients described above (Venables and Ripley, 2002).

See [Supplemental Experimental Procedures](#) for details regarding statistical analysis of the association of cell counts or Ig levels with age, gender, and season.

### Cell Count and Ig QTL Mapping

For 442 individuals, absolute cell count data and genotype information was available. For 407 individuals, Ig levels and genotype data were available. We calculated parental and grandparental percentages, which are defined as the percentage of a certain cell type within the subpopulation of cells from which it was isolated. This was performed for cell counts of all measured cell types because it has been shown that these percentages tend to reduce inter-experimental noise and therefore increase statistical power for QTL mapping (Orrù et al., 2013). Absolute cell counts and percentages were transformed by IRT (Orrù et al., 2013). Ig levels were normalized using a log<sub>2</sub> transformation. We then corrected the IRT cell counts and log<sub>2</sub> Ig values using a linear model correcting for age, gender, and month of sample collection. Lastly, QTL mapping was performed using a linear model as implemented in the Matrix-eQTL R package (Shabalin, 2012), where we associated immune traits to genotype information. A p value  $< 5e-6$  was considered to be genome-wide significant.

### Genome-wide Significant cis-eQTL Analysis

We used the LLDeep cohort (Tigchelaar et al., 2015), composed of 627 healthy Dutch volunteers, to test for possible eQTL effects of the ccQTLs. For LLDeep, both gene expression data (obtained through RNA-seq) and genotype information are available. We mapped cis-eQTLs for each identified ccQTL within a 1 Mb window. For this, we fitted a linear model using TMM-normalized (Robinson et al., 2010) expression data to the genotype information. Given that the number of tests depended on the ccQTL genomic location for each in-

dependent locus, a threshold of FDR ( $\leq 0.05$ ) was used, depending on the number of tests performed in that specific window.

### Estimation of Cell Count and Ig Level Heritability

To estimate the proportion of variance explained by genetics, we used a linear mixed model implemented in the GCTA tool (Yang et al., 2010). We applied it to each of the cell counts and percentages and to Ig levels using the complete set of genetic variants quantified in our cohort. The immune traits were pre-processed as described for QTL mapping using IRT cell counts and log<sub>2</sub> Ig values corrected for age, sex, and month of sample collection. Given the relatively small sample size, the confidence intervals for heritability estimation can be wide (Zaitlen and Kraft, 2012).

### Raw Flow Cytometry Data

The accession number for the raw flow cytometry data and analyzed data files are available upon request to the authors (<http://hfgp.bbMRI.nl>). A pipeline is available regarding further collaborations and access to additional data and samples.

### SUPPLEMENTAL INFORMATION

Supplemental Information includes Supplemental Experimental Procedures, seven figures, and five tables and can be found with this article online at <http://dx.doi.org/10.1016/j.celrep.2016.10.053>.

### AUTHOR CONTRIBUTIONS

M.G.N. and C.W. coordinated the recruitment of the cohorts. H.J.P.M.K., I.J., Y.L., V.K., M.G.N., and C.W. conceived and directed the study with input from all authors. R.A.-G., Y.L., I.J., and H.J.P.M.K. analyzed and interpreted the data. M.A.S. and L.F. provided the computational framework for the study. P.C.M.U., R.G.M., E.v.R., B.v.C., M.O., S.S., M.J., R.J.X., M.Z., A.E.v.H., F.S., and R.T.N. contributed to the data collection. R.A.-G., Y.L., H.J.P.M.K., I.J., V.K., S.W., and M.G.N. wrote the manuscript with input from all other authors. M.G.N., L.A.B.J., C.W., H.J.P.M.K., and I.J. acquired funding.

### ACKNOWLEDGMENTS

The authors thank all volunteers from the 500FG cohort of the HFPG for participation in the study. We thank Jackie Senior and Kate Mc Intyre for editorial assistance. The HFPG is supported by a European Research Council (ERC) Consolidator grant (3310372) and an IN-CONTROL CVON grant (CVON2012-03) to M.G.N., an ERC Advanced Grant (FP/2007-2013/ERC grant 2012-322698) and a Spinoza Prize (NWO SPI 92-266) to C.W., a Dutch Digestive Diseases Foundation (MLDS) grant (WO11-30) to C.W. and V.K., a European Union Seventh Framework Program (EU FP7) grant (TANDEM; HEALTH-F3-2012-305279) to C.W. and V.K., a Netherlands Organization for Scientific Research (NWO) VENI grant (863.13.011) to Y.L., a CONACYT-I2T2 scholarship (382117) to R.A.G., and a scholarship from Brazil's Science Without Borders program (11920/13-0) to P.C.M.U. This study made use of data generated by the Genome of the Netherlands project funded by NWO (grant no. 184021007), which was made available as a Rainbow Project of BBMRI-NL.

Received: May 13, 2016

Revised: August 11, 2016

Accepted: October 20, 2016

Published: November 3, 2016

### REFERENCES

Akiyama, M., Suzuki, K., Yamaoka, K., Yasuoka, H., Takeshita, M., Kaneko, Y., Kondo, H., Kassai, Y., Miyazaki, T., Morita, R., et al. (2015). Number of Circulating Follicular Helper 2 T Cells Correlates With IgG4 and Interleukin-4 Levels and Plasmablast Numbers in IgG4-Related Disease. *Arthritis Rheumatol.* 67, 2476–2481.

- Amadori, A., Zamarchi, R., De Silvestro, G., Forza, G., Cavatton, G., Danieli, G.A., Clementi, M., and Chieco-Bianchi, L. (1995). Genetic control of the CD4/CD8 T-cell ratio in humans. *Nat. Med.* *1*, 1279–1283.
- Baumgarth, N., Herman, O.C., Jager, G.C., Brown, L., Herzenberg, L.A., and Herzenberg, L.A. (1999). Innate and acquired humoral immunities to influenza virus are mediated by distinct arms of the immune system. *Proc. Natl. Acad. Sci. USA* *96*, 2250–2255.
- Benjamini, Y., and Hochberg, Y. (1995). Controlling the False Discovery Rate: A Practical and Powerful Approach to Multiple Testing. *J.R. Stat. Soc.* *57*, 289–300.
- Brodin, P., Jojic, V., Gao, T., Bhattacharya, S., Angel, C.J.L., Furman, D., Shen-Orr, S., Dekker, C.L., Swan, G.E., Butte, A.J., et al. (2015). Variation in the human immune system is largely driven by non-heritable influences. *Cell* *160*, 37–47.
- Brüggemann, M., Williams, G.T., Bindon, C.I., Clark, M.R., Walker, M.R., Jafferis, R., Waldmann, H., and Neuberger, M.S. (1987). Comparison of the effector functions of human immunoglobulins using a matched set of chimeric antibodies. *J. Exp. Med.* *166*, 1351–1361.
- Butterworth, M., McClellan, B., and Allansmith, M. (1967). Influence of sex in immunoglobulin levels. *Nature* *214*, 1224–1225.
- Carr, E.J., Dooley, J., Garcia-Perez, J.E., Lagou, V., Lee, J.C., Wouters, C., Meyts, I., Goris, A., Boeckstaens, G., Linterman, M.A., et al. (2016). The cellular composition of the human immune system is shaped by age and cohabitation. *Nat. Immunol.* *17*, 461–468.
- Cho, J.H., and Feldman, M. (2015). Heterogeneity of autoimmune diseases: pathophysiologic insights from genetics and implications for new therapies. *Nat. Med.* *21*, 730–738.
- Coffman, R.L., Lebman, D.A., and Shrader, B. (1989). Transforming growth factor beta specifically enhances IgA production by lipopolysaccharide-stimulated murine B lymphocytes. *J. Exp. Med.* *170*, 1039–1044.
- R Core Team (2012). R: A language and environment for statistical computing. <http://R-project.org/>
- Dopico, X.C., Evangelou, M., Ferreira, R.C., Guo, H., Pekalski, M.L., Smyth, D.J., Cooper, N., Burren, O.S., Fulford, A.J., Hennig, B.J., et al. (2015). Widespread seasonal gene expression reveals annual differences in human immunity and physiology. *Nat. Commun.* *6*, 7000.
- Farber, D.L., Yudanin, N.A., and Restifo, N.P. (2014). Human memory T cells: generation, compartmentalization and homeostasis. *Nat. Rev. Immunol.* *14*, 24–35.
- Fehrmann, R.S.N., Karjalainen, J.M., Krajewska, M., Westra, H.-J., Maloney, D., Simeonov, A., Pers, T.H., Hirschhorn, J.N., Jansen, R.C., Schultes, E.A., et al. (2015). Gene expression analysis identifies global gene dosage sensitivity in cancer. *Nat. Genet.* *47*, 115–125.
- Frasca, D., Diaz, A., Romero, M., Phillips, M., Mendez, N.V., Landin, A.M., and Blomberg, B.B. (2012). Unique biomarkers for B-cell function predict the serum response to pandemic H1N1 influenza vaccine. *Int. Immunol.* *24*, 175–182.
- Hazeldine, J., Hampson, P., and Lord, J.M. (2012). Reduced release and binding of perforin at the immunological synapse underlies the age-related decline in natural killer cell cytotoxicity. *Aging Cell* *11*, 751–759.
- Kanda, N., and Tamaki, K. (1999). Estrogen enhances immunoglobulin production by human PBMCs. *J. Allergy Clin. Immunol.* *103*, 282–288.
- Kanda, N., Tsuchida, T., and Tamaki, K. (1996). Testosterone inhibits immunoglobulin production by human peripheral blood mononuclear cells. *Clin. Exp. Immunol.* *106*, 410–415.
- Klein, U., Küppers, R., and Rajewsky, K. (1997). Evidence for a large compartment of IgM-expressing memory B cells in humans. *Blood* *89*, 1288–1298.
- Kurosaki, T., Kometani, K., and Ise, W. (2015). Memory B cells. *Nat. Rev. Immunol.* *15*, 149–159.
- Le Garff-Tavernier, M., Béziat, V., Decocq, J., Siguret, V., Gandjbakhch, F., Pautas, E., Debré, P., Merle-Beral, H., and Vieillard, V. (2010). Human NK cells display major phenotypic and functional changes over the life span. *Aging Cell* *9*, 527–535.
- LeMaout, J., Szabo, P., and Weksler, M.E. (1997). Effect of age on humoral immunity, selection of the B-cell repertoire and B-cell development. *Immunol. Rev.* *160*, 115–126.
- Li, Y., Oosting, M., Smeekens, S., Jaeger, M., Aguirre-Gamboa, R., Le, K.T.T., Deelen, P., Ricaño-Ponce, I., Schoffelen, T., Jansen, A.F.M., et al. (2016). A functional genomics approach to understand variation in cytokine production in humans. *Cell* *167*, 1099–1110.
- Maravillas-Montero, J.L., López-Ortega, O., Patiño-López, G., and Santos-Argumedo, L. (2014). Myosin 1g regulates cytoskeleton plasticity, cell migration, exocytosis, and endocytosis in B lymphocytes. *Eur. J. Immunol.* *44*, 877–886.
- Mazur, M., Karczewski, J., Lodyga, M., Żaba, R., and Adamski, Z. (2015). Inhibitors of phosphodiesterase 4 (PDE 4): A new therapeutic option in the treatment of psoriasis vulgaris and psoriatic arthritis. *J. Dermatolog. Treat.* *26*, 326–328.
- McIntyre, T.M., Klinman, D.R., Rothman, P., Lugo, M., Dasch, J.R., Mond, J.J., and Snapper, C.M. (1993). Transforming growth factor beta 1 selectivity stimulates immunoglobulin G2b secretion by lipopolysaccharide-activated murine B cells. *J. Exp. Med.* *177*, 1031–1037.
- Orrù, V., Steri, M., Sole, G., Sidore, C., Viridis, F., Dei, M., Lai, S., Zoledziewska, M., Busonero, F., Mulas, A., et al. (2013). Genetic variants regulating immune cell levels in health and disease. *Cell* *155*, 242–256.
- Paternoster, L., Standl, M., Chen, C.-M., Ramasamy, A., Bonnelykke, K., Duijts, L., Ferreira, M.A., Alves, A.C., Thyssen, J.P., Albrecht, E., et al.; Australian Asthma Genetics Consortium (AAGC); Genetics of Overweight Young Adults (GOYA) Consortium; EARly Genetics & Lifecourse Epidemiology (EAGLE) Consortium (2011). Meta-analysis of genome-wide association studies identifies three new risk loci for atopic dermatitis. *Nat. Genet.* *44*, 187–192.
- Peter, D., Jin, S.L.C., Conti, M., Hatzelmann, A., and Zitt, C. (2007). Differential expression and function of phosphodiesterase 4 (PDE4) subtypes in human primary CD4+ T cells: predominant role of PDE4D. *J. Immunol.* *178*, 4820–4831.
- Peters, J.H., Koenen, H.J.P.M., Fasse, E., Tijssen, H.J., Ijzermans, J.N.M., Groenen, P.J.T.A., Schaap, N.P.M., Kwekkeboom, J., and Joosten, I. (2013). Human secondary lymphoid organs typically contain polyclonally-activated proliferating regulatory T cells. *Blood* *122*, 2213–2223.
- Quinn, J.J., and Chang, H.Y. (2016). Unique features of long non-coding RNA biogenesis and function. *Nat. Rev. Genet.* *17*, 47–62.
- Restifo, N.P., and Gattinoni, L. (2013). Lineage relationship of effector and memory T cells. *Curr. Opin. Immunol.* *25*, 556–563.
- Robinson, M.D., McCarthy, D.J., and Smyth, G.K. (2010). edgeR: a Bioconductor package for differential expression analysis of digital gene expression data. *Bioinformatics* *26*, 139–140.
- Roederer, M., Quaye, L., Mangino, M., Beddall, M.H., Mahnke, Y., Chattopadhyay, P., Tosi, I., Napolitano, L., Terranova Barberio, M., Menni, C., et al. (2015). The genetic architecture of the human immune system: a bioresource for autoimmunity and disease pathogenesis. *Cell* *161*, 387–403.
- Rowley, M.J., and Mackay, I.R. (1969). Measurement of antibody-producing capacity in man. I. The normal response to flagellin from *Salmonella adelaide*. *Clin. Exp. Immunol.* *5*, 407–418.
- Schirmer, M., Smeekens, S.P., Vlamakis, H., Jaeger, M., Oosting, M., Franzosa, E.A., Jansen, T., Jacobs, L., Bonder, M.J., Kurilshikov, A., Fu, J., et al. (2016). Linking the gut microbiome to inflammatory cytokine production capacity. *Cell* *167*, 1125–1136.
- Schroeder, H.W., Jr., and Cavacini, L. (2010). Structure and function of immunoglobulins. *J. Allergy Clin. Immunol.* *125* (2, Suppl 2), S41–S52.
- Shabalina, A.A. (2012). Matrix eQTL: ultra fast eQTL analysis via large matrix operations. *Bioinformatics* *28*, 1353–1358.
- Shaw, A.C., Goldstein, D.R., and Montgomery, R.R. (2013). Age-dependent dysregulation of innate immunity. *Nat. Rev. Immunol.* *13*, 875–887.
- Snapper, C.M., and Paul, W.E. (1987). Interferon-gamma and B cell stimulatory factor-1 reciprocally regulate Ig isotype production. *Science* *236*, 944–947.

- Solana, R., Pawelec, G., and Tarazona, R. (2006). Aging and innate immunity. *Immunity* *24*, 491–494.
- Tangye, S.G., Deenick, E.K., Palendira, U., and Ma, C.S. (2012). T cell-B cell interactions in primary immunodeficiencies. *Ann. N Y Acad. Sci.* *1250*, 1–13.
- ter Horst, R., Jaeger, M., Smeekens, S.P., Oosting, M., Swertz, M.A., Li, Y., Kumar, V., Diavatopoulos, D.A., Jansen, A.F.M., Lemmers, H., et al. (2016). Host and environmental factors influencing individual human cytokine responses. *Cell* *167*, 1111–1124.
- Tigchelaar, E.F., Zhenakova, A., Dekens, J.A.M., Hermes, G., Baranska, A., Mujagic, Z., Swertz, M.A., Muñoz, A.M., Deelen, P., Cénit, M.C., et al. (2015). Cohort profile: LifeLines DEEP, a prospective, general population cohort study in the northern Netherlands: study design and baseline characteristics. *BMJ Open* *5*, e006772.
- Tsang, J.S., Schwartzberg, P.L., Kotliarov, Y., Biancotto, A., Xie, Z., Germain, R.N., Wang, E., Olnes, M.J., Narayanan, M., Golding, H., et al.; Baylor HIPC Center; CHI Consortium (2014). Global analyses of human immune variation reveal baseline predictors of postvaccination responses. *Cell* *157*, 499–513.
- Venables, W.N., and Ripley, B.D. (2002). *Modern Applied Statistics with S* (New York: Springer).
- Weller, S., Braun, M.C., Tan, B.K., Rosenwald, A., Cordier, C., Conley, M.E., Plebani, A., Kumararatne, D.S., Bonnet, D., Tournilhac, O., et al. (2004). Human blood IgM “memory” B cells are circulating splenic marginal zone B cells harboring a prediversified immunoglobulin repertoire. *Blood* *104*, 3647–3654.
- Yang, J., Benyamin, B., McEvoy, B.P., Gordon, S., Henders, A.K., Nyholt, D.R., Madden, P.A., Heath, A.C., Martin, N.G., Montgomery, G.W., et al. (2010). Common SNPs explain a large proportion of the heritability for human height. *Nat. Genet.* *42*, 565–569.
- Zaitlen, N., and Kraft, P. (2012). Heritability in the genome-wide association era. *Hum. Genet.* *131*, 1655–1664.

## Supplemental Information

### Differential Effects of Environmental and Genetic

### Factors on T and B Cell Immune Traits

**Raul Aguirre-Gamboa, Irma Joosten, Paulo C.M. Urbano, Renate G. van der Molen, Esther van Rijssen, Bram van Cranenbroek, Marije Oosting, Sanne Smeekens, Martin Jaeger, Maria Zorro, Sebo Withoff, Antonius E. van Herwaarden, Fred C.G.J. Sweep, Romana T. Netea, Morris A. Swertz, Lude Franke, Ramnik J. Xavier, Leo A.B. Joosten, Mihai G. Netea, Cisca Wijmenga, Vinod Kumar, Yang Li, and Hans J.P.M. Koenen**



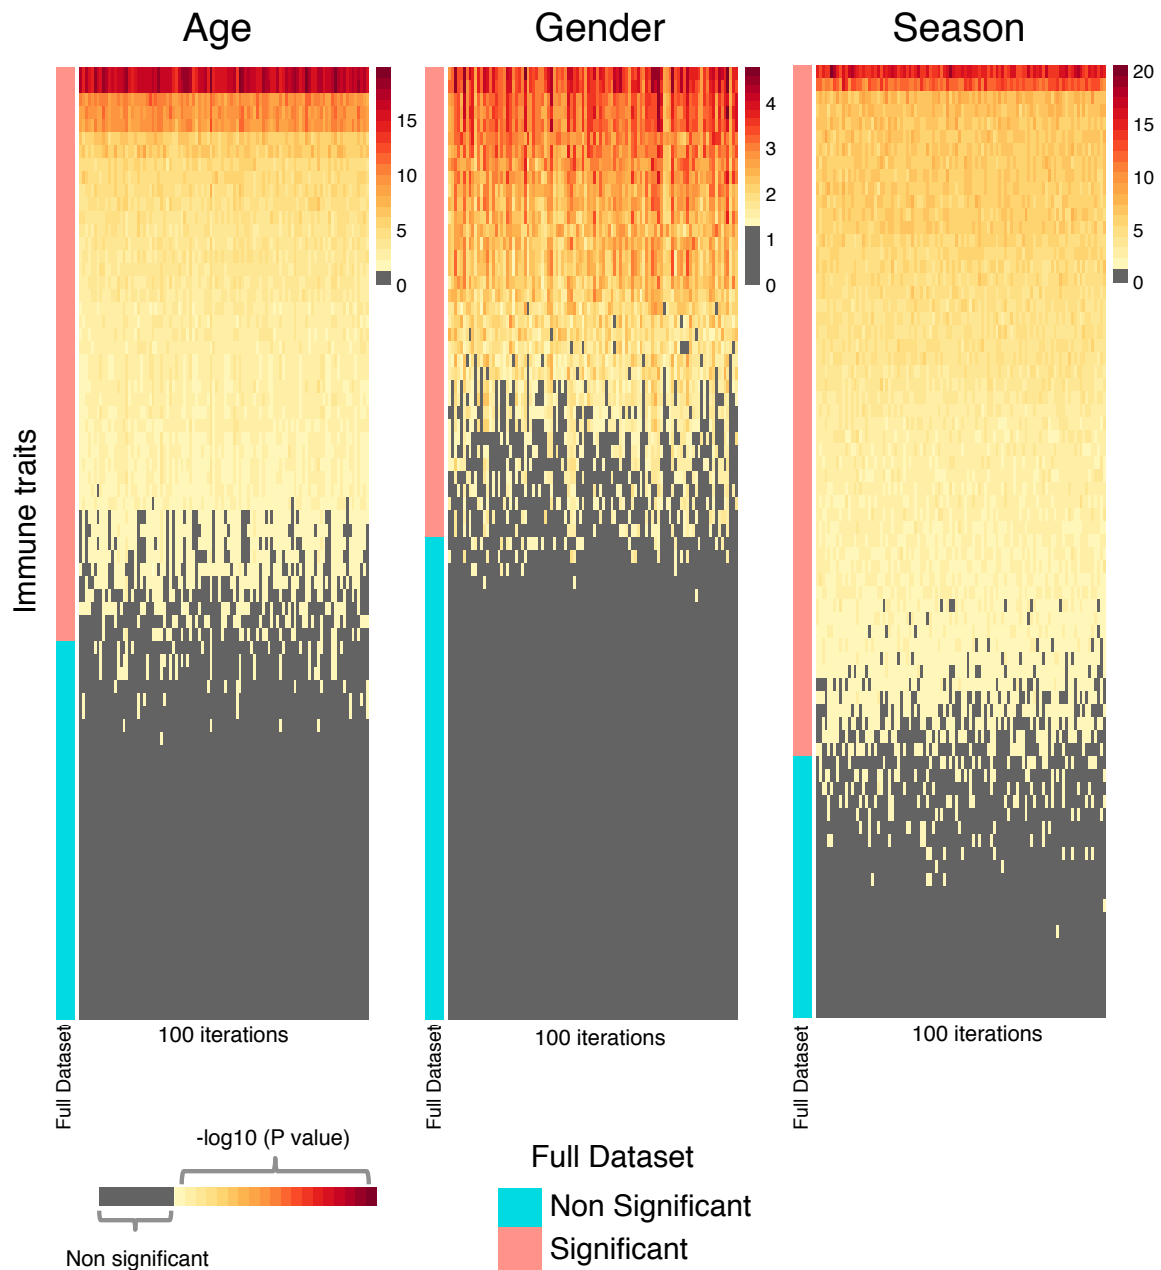

**Figure S1: Robustness of age, gender and season effect on immune traits.** (Related to Figure 3). We randomly selected 90% of all the samples and performed statistical tests for each different type of association. For the age effect on immune traits we used the Spearman correlation; for the gender effect on immune traits we used a t-test; and for the seasonal effect on immune traits we used a cosinor model. We repeated this 100 times and show the statistical significance for each test ( $-\log_{10} P$  value) using gradient colour. In each panel, the rows represent the immune traits, and the columns represent each individual resampling. We counted the number of traits that show consistent results when compared with the original full dataset in more than 70% of the sampling. In this way we could reproduce 91% of all the immune traits of the age effects, 87% of the gender effects and 94% of the seasonal effects.

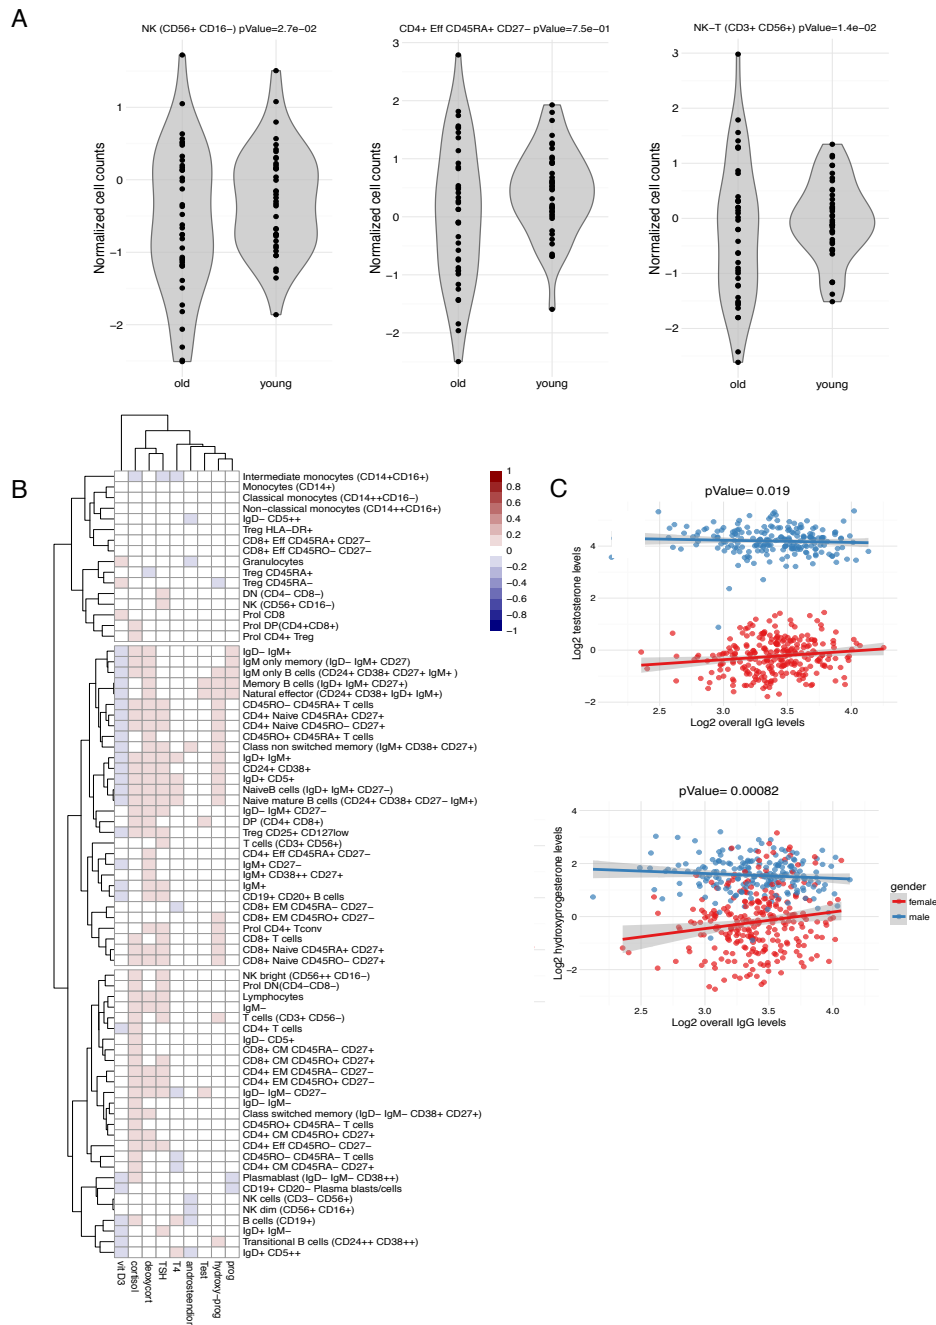

**Figure S2: Immune traits can be modulated by non-heritable factors.** (Related to Figure 3)(A) Variation of cell levels comparing the oldest and youngest volunteers from our cohort. (B) Hierarchical clustering of the correlation between hormones and cell levels in the 500FG cohort. (C) Correlation of testosterone (upper panel) and 17-hydroxyprogesterone (lower panel) levels with IgG levels in males versus females. .

Figure S3

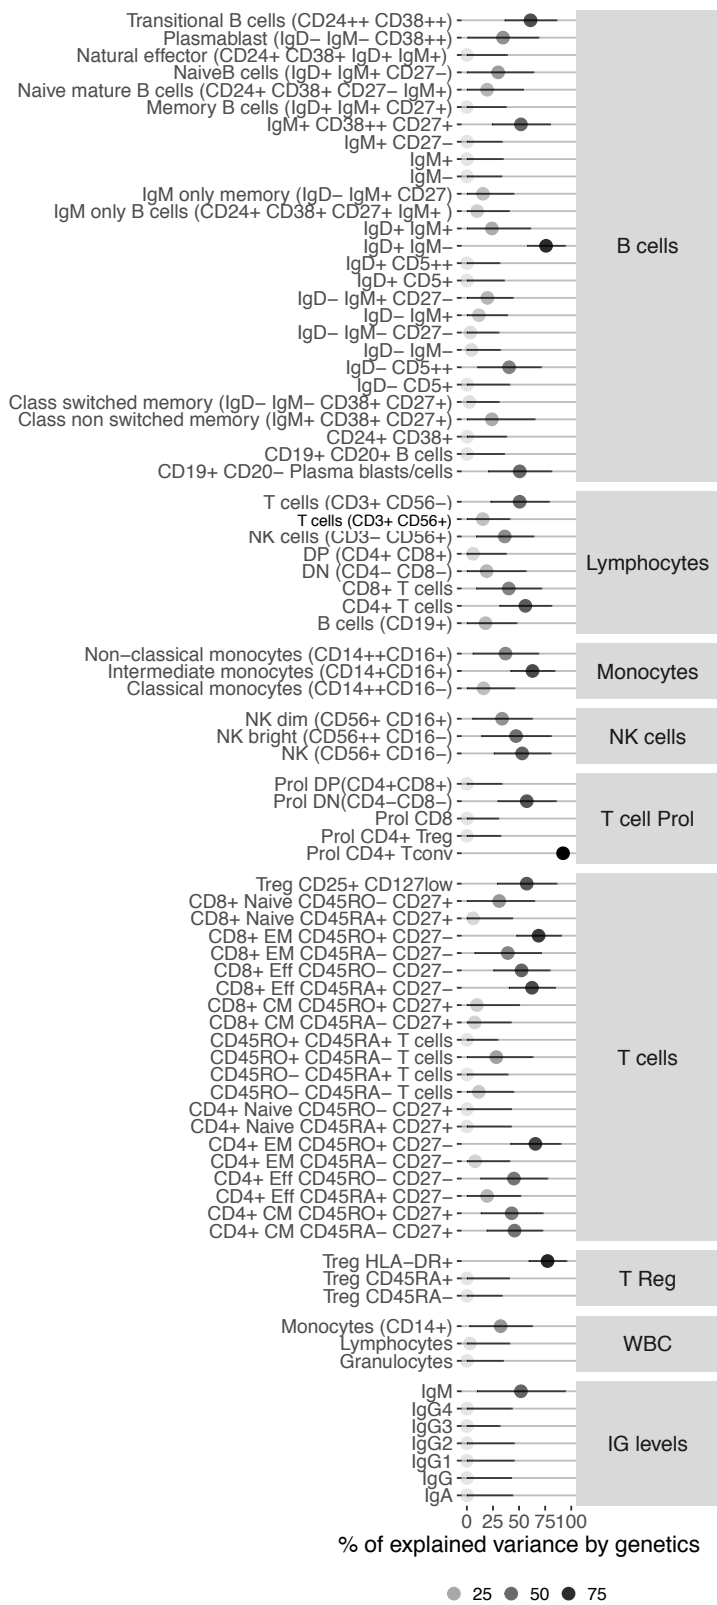

Figure S3: Proportion of variance explained by genetics in each of the 73 independent cell types. (Related to Figure 4)

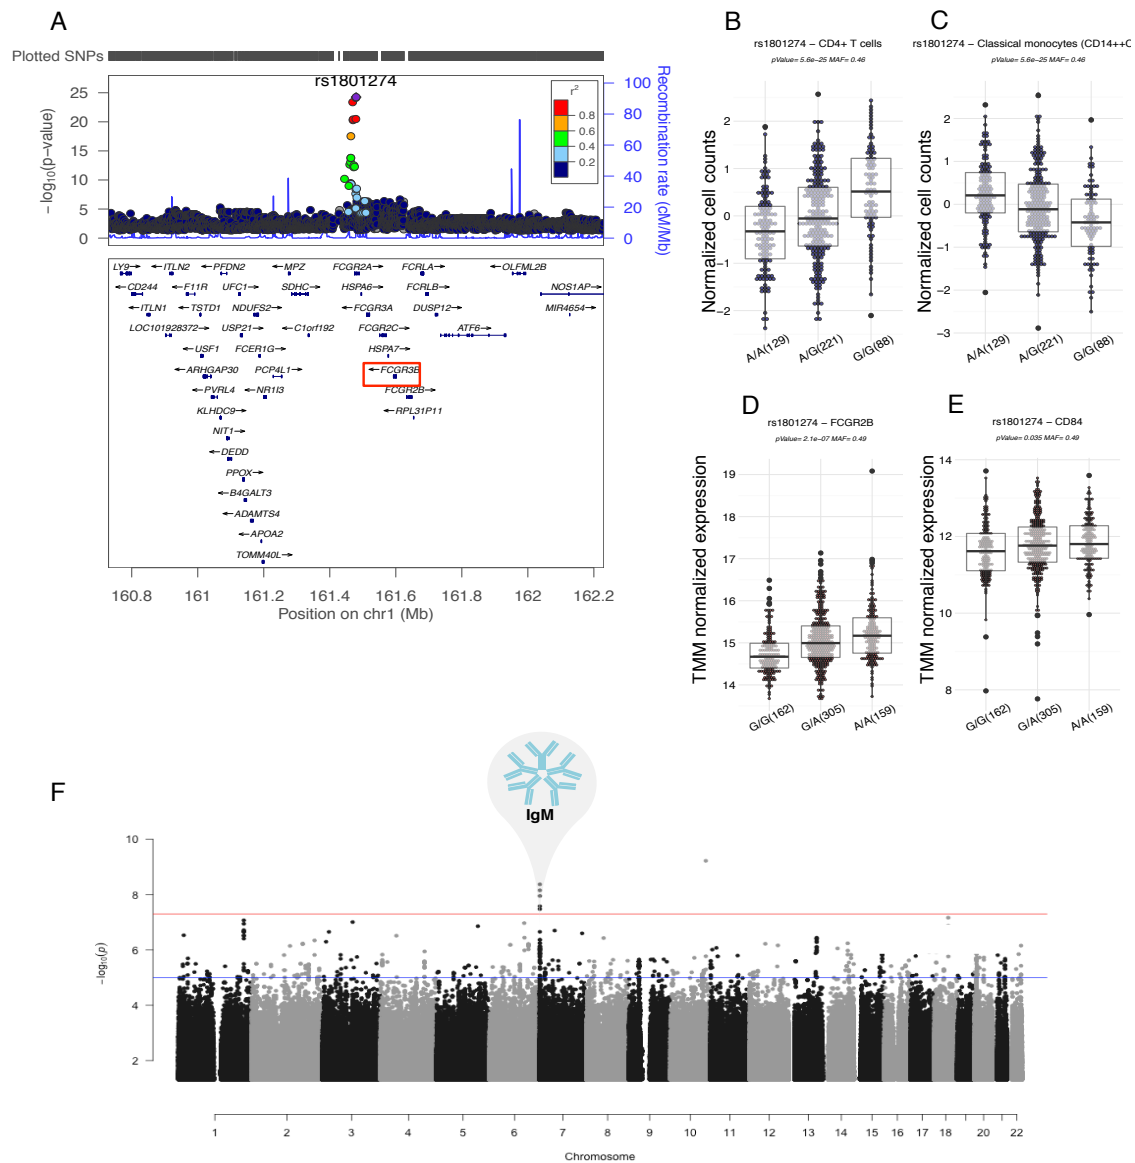

**Figure S4: Combined Manhattan plot of immunoglobulin levels associations with genotypes and the ccQTL in the FC locus has been previously reported in two independent studies.** (Related to Figure 4). (A) One genome-wide significant Ig associated locus (rs62433089,  $P < 5E-08$ ) was detected with a MAF  $\geq 0.01$ . (B) A regional plot of the ccQTL located in the FC cluster. (C) and (D) ccQTLs box plots for CD4+ T cells and for classic monocytes, respectively. (E) and (F) cis expression QTL plots from the TC locus based on ~600 RNA-seq blood samples.

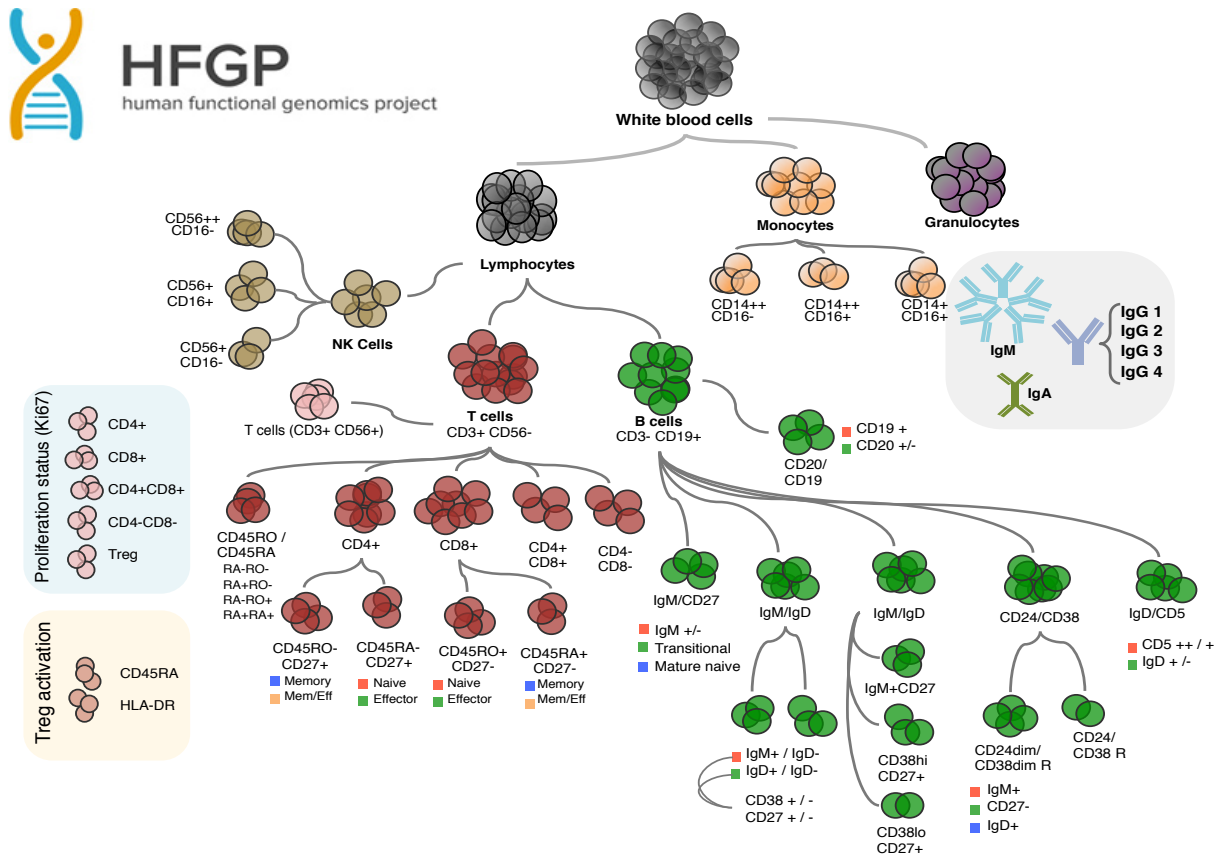

**Figure S5: Immune cell subpopulations and serum immunoglobulin levels studied in the human functional genomics project.** (Related to Figures 1-6) Schematic representation of the cell subpopulations and immunoglobulin subclasses quantified in the 500FG cohort. In freshly drawn blood samples, myeloid cells (granulocytes, monocyte subsets) and lymphoid immune cells (T cell subsets, B cell subsets, NK cells, CD3<sup>+</sup> CD56<sup>+</sup> T cells) were analysed by 10-color flow cytometry. Serum immunoglobulin levels were analysed by fluorescence enzyme immunoassay (FEIA).

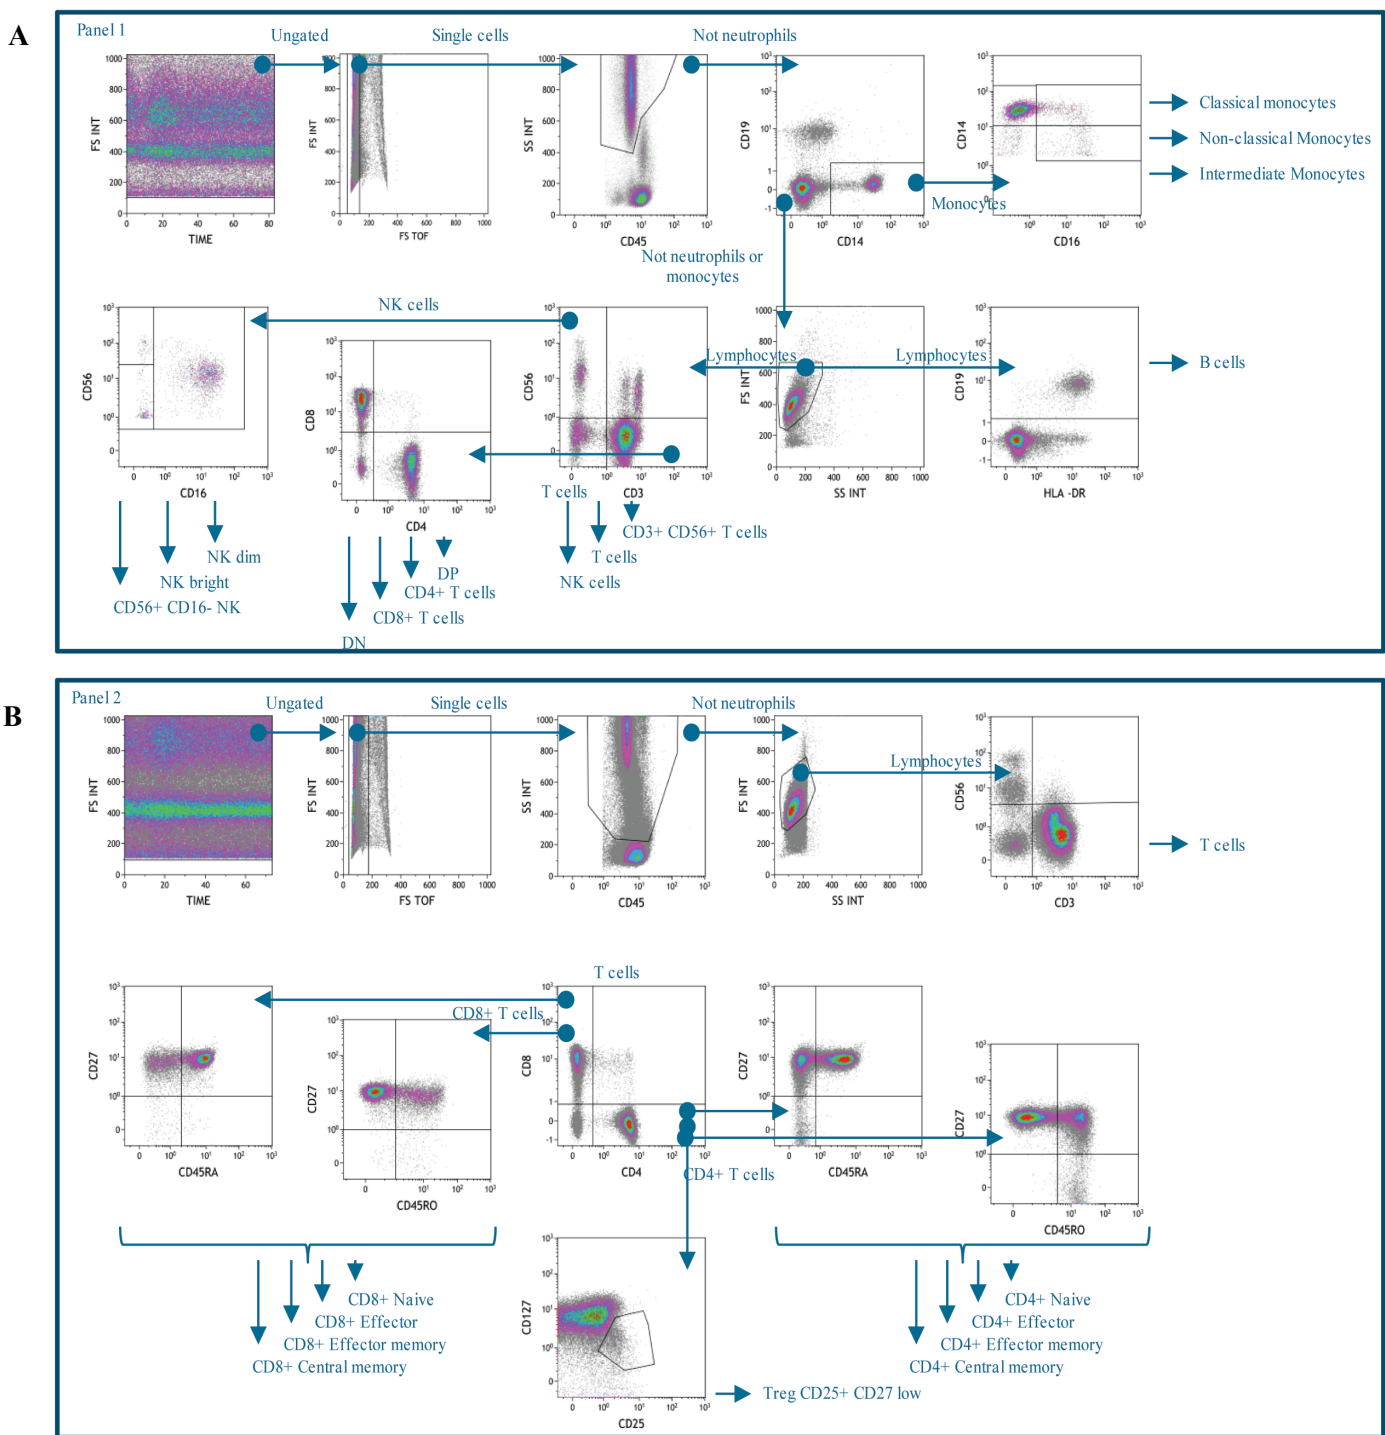

Figure S6: Flow cytometry gating strategy of the general (A) and T cells (B) panel. (Related to Figures 1-6)

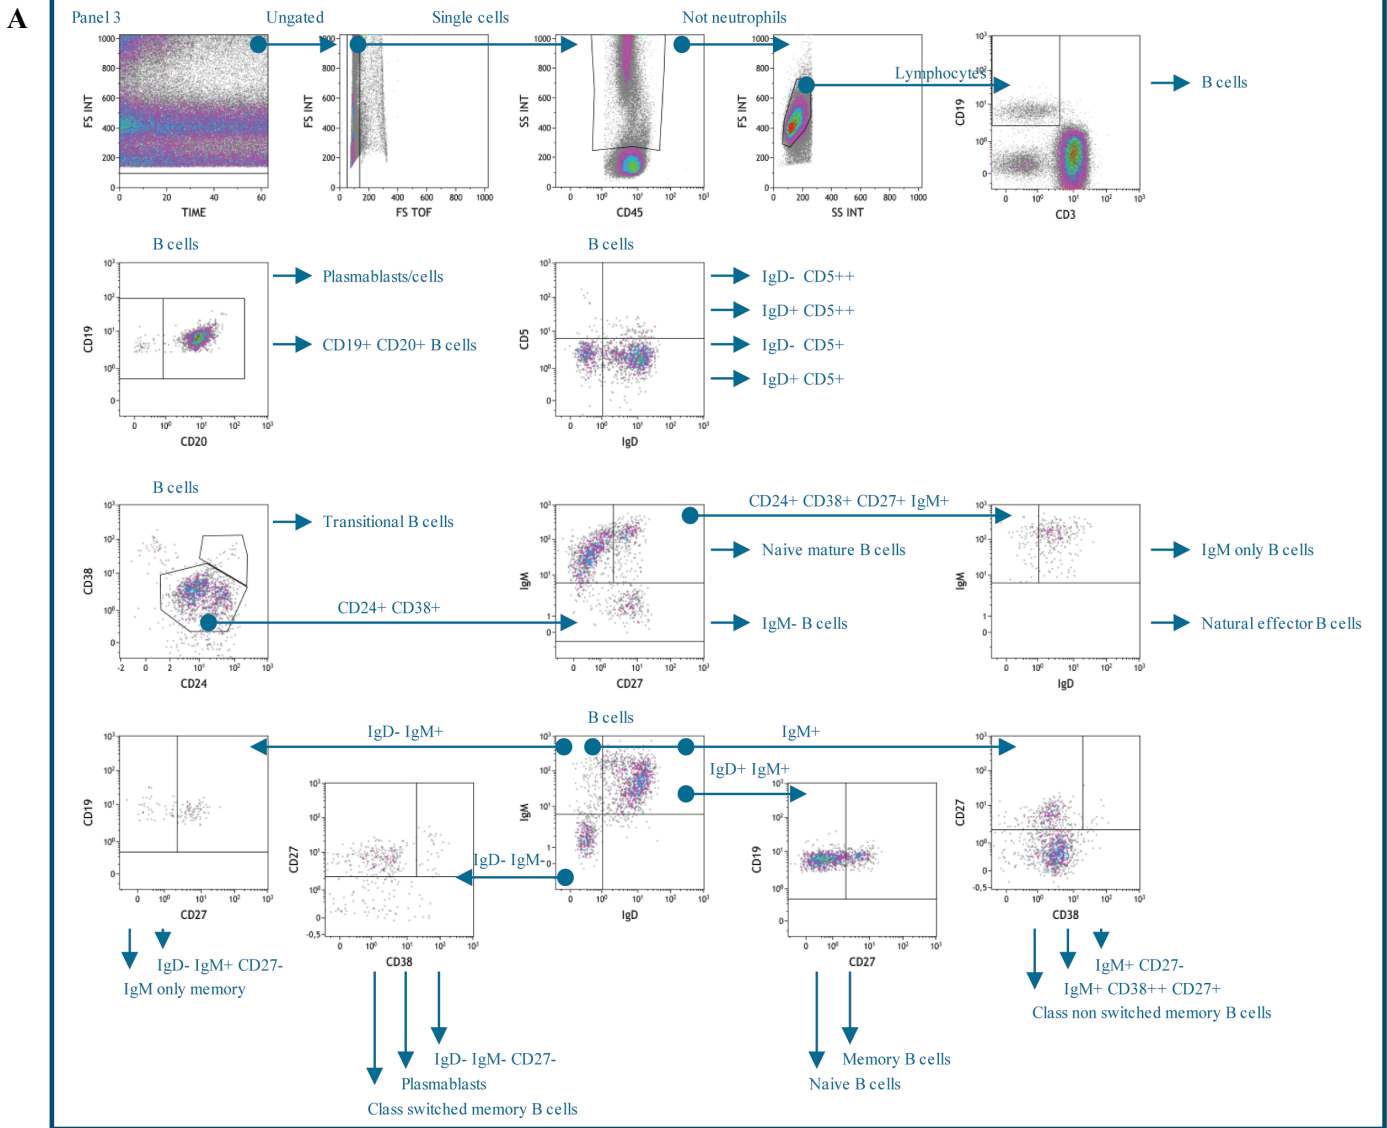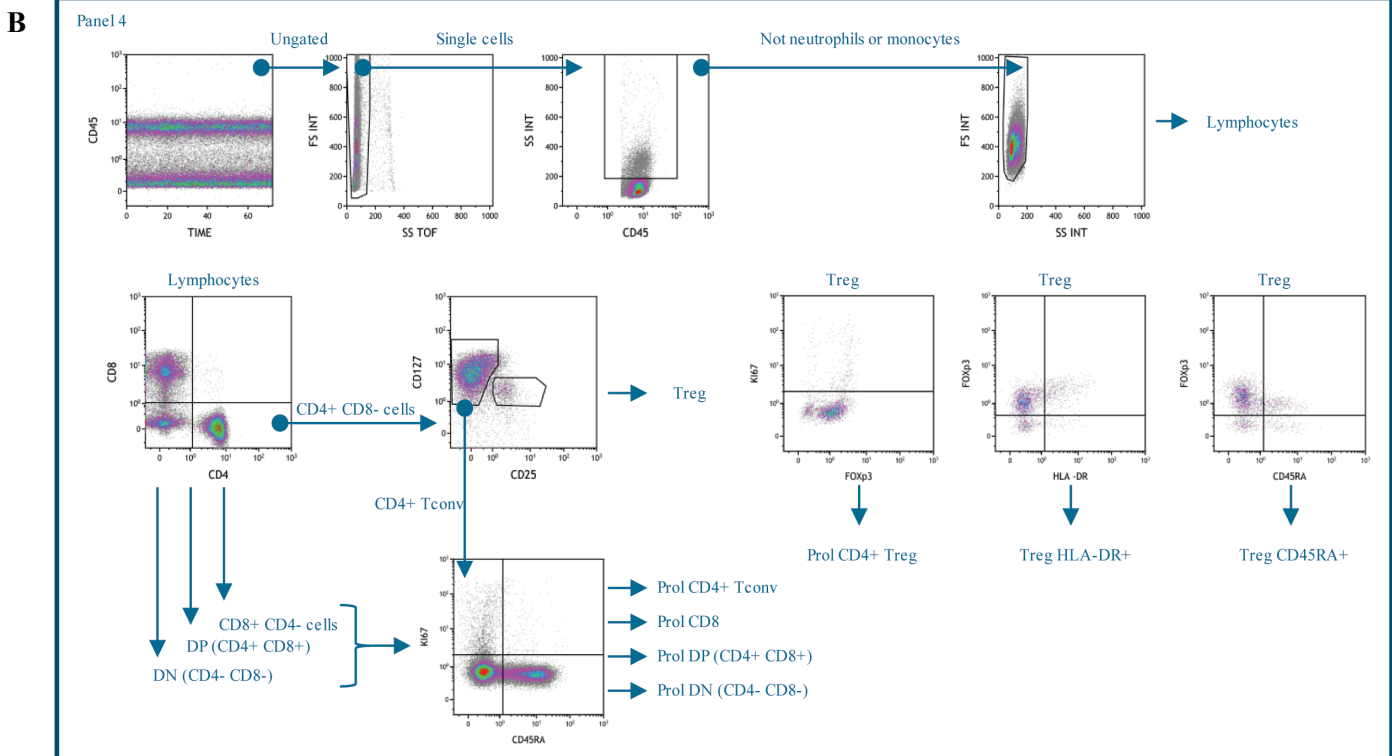

**Figure S7: Flow cytometry gating strategy for the B cell (A) and intracellular Tcell/Treg (B) panel.**  
(Related to Figures 1-6)

**Table S3.** Table of GW significant loci and all the cell subpopulations which had either a GWA p-Value or a suggestive p-Value ( $\leq 1 \times 10^{-6}$ )

| SNP        | CHR | BP        | ccQTL P <sup>1</sup> | GW significantly associated cell types                                                                                                                                                                                                                                                                                                                                                                                                                                                                                                                                       | Suggestively associated traits *          |
|------------|-----|-----------|----------------------|------------------------------------------------------------------------------------------------------------------------------------------------------------------------------------------------------------------------------------------------------------------------------------------------------------------------------------------------------------------------------------------------------------------------------------------------------------------------------------------------------------------------------------------------------------------------------|-------------------------------------------|
| rs1801274  | 1   | 161479745 | 5.60E-25             | %P_T cells (CD3+ CD56-),%G_CD4+ T cells,%G_CD8+ T cells,%G_NK bright (CD56++ CD16-),%P_CD45RO- CD45RA+ T cells,%P_Treg CD25+ CD127low,%G_Treg CD25+ CD127low,%P_CD4+ Naive CD45RA+ CD27+,%G_CD4+ Naive CD45RA+ CD27+,%G_CD4+ CM CD45RA- CD27+,%P_CD4+ Naive CD45RO- CD27+,%G_CD4+ Naive CD45RO- CD27+,%P_CD4+ CM CD45RO+ CD27+,%G_CD4+ CM CD45RO+ CD27+,%P_CD8+ Naive CD45RA+ CD27+,%P_CD8+ Naive CD45RO- CD27+,Non-classical monocytes (CD14++CD16+),%P_Classical monocytes (CD14++CD16-),%P_Non-classical monocytes (CD14++CD16+),%G_Non-classical monocytes (CD14++CD16+) | %P_Treg CD25+ CD127low                    |
| rs72744884 | 2   | 241782823 | 2.20E-09             | CD4+ EM CD45RO+ CD27-                                                                                                                                                                                                                                                                                                                                                                                                                                                                                                                                                        | CD4+ EM CD45RA- CD27-                     |
| rs153414   | 5   | 153748732 | 3.60E-08             | CD4+ Tcells, Monocytes (CD14+)                                                                                                                                                                                                                                                                                                                                                                                                                                                                                                                                               | Monocytes (CD14+),CD45RO- CD45RA+ T cells |
| rs10277809 | 7   | 44948953  | 2.80E-08             | IgM only B cells (CD24+ CD38+ CD27+ IgM+ )                                                                                                                                                                                                                                                                                                                                                                                                                                                                                                                                   | IgM only memory (IgD- IgM+ CD27)          |
| rs2707213  | 12  | 6899181   | 1.30E-09             | %P_DP (CD4+ CD8+),%G_DP (CD4+ CD8+),DP (CD4+ CD8+)                                                                                                                                                                                                                                                                                                                                                                                                                                                                                                                           |                                           |
| rs7403546  | 15  | 87871288  | 2.30E-08             | Class non switched memory (IgM+ CD38+ CD27+)                                                                                                                                                                                                                                                                                                                                                                                                                                                                                                                                 |                                           |
| rs2164983  | 19  | 8789381   | 2.70E-08             | %G_NK bright (CD56++ CD16-)                                                                                                                                                                                                                                                                                                                                                                                                                                                                                                                                                  | %P_Memory B cells (IgD+ IgM+ CD27+)       |
| rs280499   | 19  | 10489606  | 5.70E-09             | CD8+ CM CD45RO+ CD27+                                                                                                                                                                                                                                                                                                                                                                                                                                                                                                                                                        | CD8+ CM CD45RA- CD27+                     |

\* Nominal p-value  $\leq 1 \times 10^{-5}$



**Table S4.** 10 colour flow cytometry panels used in the FG500 study. Samples were analysed by a 3-laser Navios (Beckman Coulter)

**\*(ic); intracellular staining**

|                                         | Flow channel | FL1          | FL2       | FL3          | FL4             | FL5        | FL6          | FL7                   | FL8                   | FL9         | FL10      |
|-----------------------------------------|--------------|--------------|-----------|--------------|-----------------|------------|--------------|-----------------------|-----------------------|-------------|-----------|
| <b>General panel</b>                    | whole blood  | CD16         | HLA-DR    | CD14         | CD4             | CD25       | CD56         | CD8                   | CD19                  | CD3         | CD45      |
|                                         |              | 3G8          | immu-357  | UCHT1        | 13B8.2          | M-A251     | N901         | B9.11                 | J3-119                | UCHT1       | J33       |
|                                         |              | Coulter      | Coulter   | Coulter      | Coulter         | BD         | Coulter      | Coulter               | Coulter               | Coulter     | Coulter   |
|                                         | fluorochrome | <b>FITC</b>  | <b>PE</b> | <b>ECD</b>   | <b>PE-Cy5.5</b> | <b>PC7</b> | <b>APC</b>   | <b>APC-<br/>AF700</b> | <b>APC-<br/>AF750</b> | <b>PB</b>   | <b>KO</b> |
| <b>T cell panel</b>                     | whole blood  | CD45RA       | CD3       | CD45RO       | CD27            | CD25       | CD56         | CD127                 | CD8                   | CD4         | CD45      |
|                                         |              | ALB11        | UCHT1     | UCHL1        | 1A4CD27         | M-A251     | N901         | R34.34                | B9.11                 | 13B8.2      | J33       |
|                                         |              | Coulter      | Coulter   | Coulter      | Coulter         | BD         | Coulter      | Coulter               | Coulter               | Coulter     | Coulter   |
|                                         | fluorochrome | <b>FITC</b>  | <b>PE</b> | <b>ECD</b>   | <b>PE-Cy5.5</b> | <b>PC7</b> | <b>APC</b>   | <b>APC-<br/>AF700</b> | <b>APC-<br/>AF750</b> | <b>PB</b>   | <b>KO</b> |
| <b>B cell panel</b>                     | whole blood  | IgD          | IgM       | CD3          | CD27            | CD38       | CD24         | CD5                   | CD19                  | CD20        | CD45      |
|                                         |              | IADB6        | SA-DA4    | UCHT1        | 1A4CD27         | LS198-4-3  | ALB9         | BL1a                  | J3-119                | B9E9        | J33       |
|                                         |              | Coulter      | Coulter   | Coulter      | Coulter         | Coulter    | Coulter      | Coulter               | Coulter               | Coulter     | Coulter   |
|                                         | fluorochrome | <b>AF488</b> | <b>PE</b> | <b>ECD</b>   | <b>PE-Cy5.5</b> | <b>PC7</b> | <b>AF647</b> | <b>APC-<br/>AF700</b> | <b>APC-<br/>AF750</b> | <b>e450</b> | <b>KO</b> |
| <b>T cell division /<br/>Treg panel</b> | PBMC         | KI67 (ic)*   | HLA-DR    | CD45RA       | CD4             | CD25       | Helios (ic)  | CD127                 | CD8                   | FoxP3 (ic)  | CD45      |
|                                         |              | B56          | immu-357  | 2H4LDH11LDB9 | 13B8.2          | M-A251     | 22F6         | R34.34                | B9.11                 | PCH101      | J33       |
|                                         |              | BD           | Coulter   | Coulter      | Coulter         | BD         | Biolegend    | Coulter               | Coulter               | eBioscience | Coulter   |

## Supplemental Figures

**Figure S1: Robustness of age, gender and season effect on immune traits.** (Related to Figure 3). We randomly selected 90% of all the samples and performed statistical tests for each different type of association. For the age effect on immune traits we used the Spearman correlation; for the gender effect on immune traits we used a *t*-test; and for the seasonal effect on immune traits we used a cosinor model. We repeated this 100 times and show the statistical significance for each test ( $-\log_{10}$  P value) using gradient colour. In each panel, the rows represent the immune traits, and the columns represent each individual resampling. We counted the number of traits that show consistent results when compared with the original full dataset in more than 70% of the sampling. In this way we could reproduce 91% of all the immune traits of the age effects, 87% of the gender effects and 94% of the seasonal effects.

**Figure S2: Immune traits can be modulated by non-heritable factors.** (Related to Figure 3)(A) Variation of cell levels comparing the oldest and youngest volunteers from our cohort. (B) Hierarchical clustering of the correlation between hormones and cell levels in the 500FG cohort. (C) Correlation of testosterone (upper panel) and 17-hydroxyprogesterone (lower panel) levels with IgG levels in males versus females.

**Figure S3: Proportion of variance explained by genetics in each of the 73 independent cell types.** (Related to Figure 4)

**Figure S4: Combined Manhattan plot of immunoglobulin levels associations with genotypes and the ccQTL in the FC locus has been previously reported in two independent studies.** (Related to Figure 4). (A) One genome-wide significant Ig associated locus (rs62433089,  $P < 5E-08$ ) was detected with a  $MAF \geq 0.01$ . (B) A regional plot of the ccQTL located in the FC cluster. (C) and (D) ccQTLs box plots for CD4+ T cells and for classic monocytes, respectively. (E) and (F) *cis* expression QTL plots from the TC locus based on ~600 RNA-seq blood samples.

**Figure S5: Immune cell subpopulations and serum immunoglobulin levels studied in the human functional genomics project.** (Related to Figures 1-6) Schematic representation of the cell subpopulations and immunoglobulin subclasses quantified in the 500FG cohort. In freshly drawn blood samples, myeloid cells (granulocytes, monocyte subsets) and lymphoid immune cells (T cell subsets, B cell subsets, NK cells, CD3+ CD56+ T cells) were analysed by 10-color flow cytometry. Serum immunoglobulin levels were analysed by fluorescence enzyme immunoassay (FEIA).

**Figure S6: Flow cytometry gating strategy of the general (A) and T cells (B) panel.** (Related to Figures 1-6)

**Figure S7: Flow cytometry gating strategy for the B cell (A) and intracellular Tcell/Treg (B) panel.** (Related to Figures 1-6)

## **Supplemental Tables**

**Table S1: Summary statistics for all cell counts and immunoglobulin level associations.** (Related to Figure 1). (Excel file)

**Table S2: Summary statistics for all associations of cell counts and immunoglobulin levels with age, gender and season.** (Related to Figure 3) (Excel file)

**Table S3: Table of GW significant loci and all the cell subpopulations which had either a GWA p-Value or a suggestive p-Value ( $\leq 1 \times 10^{-6}$ ).** (Related to Table1). (Word file)

**Table S4: 10 colour flow cytometry panels used in the 500FG study.** (Related to Figures 1-6. (Word file)

**Table S5: Distribution of the 73 independent cell count levels before and after inverse rank transformation.**(Related to Figures 1 and 3). (Excel file)

## Extended experimental procedures

### Immunophenotyping

#### *Peripheral blood mononuclear cell isolation and staining*

Blood was collected in 10 ml BD Vacutainer® spray-coated K2EDTA tubes. Fresh peripheral blood cells were counted using a Coulter Ac-T Diff® cell counter (Beckman Coulter, Brea, USA) that was calibrated daily. The absolute number of white blood cells (WBC) per ml of blood determined by the cell counter was used to calculate the absolute numbers of CD45+WBC cell subsets as measured by flow cytometry. As an example, WBC  $8 \times 10^6$ /ml blood represents the CD45+ WBC as identified by flow cytometry, 5% CD14+ monocytes represent  $0.4 \times 10^6$  CD14+ monocytes/blood. Both erythrocyte-lysed whole blood samples (panel 1-3) and density gradient isolated PBMC (panel 4) were analyzed by flow cytometry.

#### *Cell Processing (whole blood and PBMC)*

1.5 ml whole blood was incubated in lysis buffer containing 3.0 M  $\text{NH}_4\text{Cl}$ , 0.2 M  $\text{KHCO}_3$  and 2mM  $\text{Na}_4\text{EDTA}$  for 10 min to lyse erythrocytes. Remaining white blood cells were further diluted with 25 ml PBS (Braun, Melsungen, Germany) and spun down at 452 x g for 5 min at room temperature (RT). Cells were washed and spun down in PBS (Braun) once again and resuspended in 300  $\mu\text{l}$  of PBS + 0.2% BSA (Sigma-Aldrich, Zwijndrecht, Netherlands). 100  $\mu\text{l}$  was transferred for surface staining to each of 3 wells of a 96 well v-bottom plate (Greiner Bio-One, Frickenhausen, Germany).

For PBMC isolation 8.5 ml of whole blood was placed on top of a density gradient layer (Lymphoprep™, Axis-Shield, Oslo, Norway) and centrifuged at 804 x g for 20 minutes at RT, no brake. Interphase containing purified PBMC was transferred to a new tube and washed twice with PBS at 452 x g for 5 minutes. Cells were resuspended in PBS and cell count was performed. For staining  $0.5 \times 10^6$  cells were transferred to 1 well of a 96 well v-bottom plate.

### Reagents

**Table S3** shows the fluorochrome conjugate and clone identity of the antibodies that were used in the antibody panels. Immunofluorescence reagents used to generate the panel master mixes were purchased from Beckman Coulter (Marseille, France), Becton Dickinson (San Jose, USA), eBioscience (Vienna, Austria) or BioLegend (San Diego, USA). All reagents were titrated and tested before they were used in the current study.

### Staining

All cells were surface stained in 25  $\mu\text{l}$  of surface staining master mix at RT for 20 minutes. Cells were washed twice by adding PBS + 0.2% BSA and centrifuged at 250 x g for 2.5 min. Buffer was removed by flicking the plates. Before acquisition, whole blood derived cells were resuspended in 100  $\mu\text{l}$  PBS + 0.2% BSA.

For intracellular staining, the surface stained PBMC were fixed and permeabilized using Fix/Perm solution (eBioscience, Vienna, Austria). After 30 minutes at 4°C protected from light, cells were washed and centrifuged at 250 x g for 2.5 min twice using permeabilisation buffer (eBioscience, Vienna, Austria). Then, 25  $\mu\text{l}$  of intracellular staining master mix was applied and the samples were incubated for 30 minutes at 4°C protected from light. After a second washing step using permeabilisation buffer, cells were resuspended in 100  $\mu\text{l}$  PBS + 0.2% BSA for data acquisition.

### Gating strategy

Each sample was analyzed by four 10-color antibody panels: 1. general, 2. T cell, 3. B cell and 4. intracellular T cell/Treg. Gating strategy and example stainings are illustrated in **Figure S6** and **S7**.

For every panel, the single cells within the leukocyte (CD45+) population were first gated and thereafter the major myeloid or lymphoid lineages identified. Single cells were identified by plotting the FS Time Of Flight (FS TOF) against FS. Given that single leukocytes need a well defined period of time to pass the laser, this parameter can be used to identify single cells. The first 178 out of 516 samples included did not include the TOF parameter. In these samples the leukocyte population was gated on the CD45+ leukocytes.

In panel 1, granulocytes and lymphocytes were discriminated by forward scatter and side scatter, while monocytes were characterized by CD14 expression. Within the lymphocytes, T cells (CD3+, CD56-), NK cells (CD3-, CD56+), CD3+ CD56+ T cells and B cells (CD19+, HLA-DR+) were characterized. Subpopulations within T cells, NK cells and monocytes were analyzed by CD4 and CD8, CD56 and CD16, and CD14 and CD16 expression, respectively.

In panel 2, CD4+ regulatory T cells (Treg, CD4+, CD25+ CD127 low) and CD45RA/CD27 and CD45RO/CD27 maturation stages of CD4 and CD8 T cells were identified.

Panel 3 aimed to define CD19+ B cell maturation stages by the expression of IgM/IgD and/or CD24/CD38 expression as proposed previously (Berkowska et al., 2011; Wehr et al., 2008). B cell subsets were additionally identified by differential CD19/CD20 and IgD/CD5 expression. Although it may identify redundant B cell

populations, we decided to use different multiple gating strategies to cover most of the B cell subpopulations that have been described.

In panel 4, the major T cell populations (CD4, CD8 and Treg) were identified and subsequently analyzed for proliferation status by intracellular Ki67 expression. Treg (CD4+, CD25+ CD127low FOXP3+) were analyzed for expression of CD45RA and HLA-DR. Absolute cell counts in panel 4 (PBMC obtained after density gradient isolation) were calculated as described above taking into account the whole blood cell counts minus the granulocyte number as determined in panel 1. Variability in the median fluorescence intensity of the immune markers during the 1.5 year acquisition period was low (%CV of all markers ranges from 0.15–0.38, %CV for CD16 = 0.53). In case of a limited number of specimens the pre-defined gate setting was slightly modified as biological variation sometimes seems to influence forward and side scatter (FSC and SSC, resp.). In a minor number of specimens biological variation led to altered expression of lineage markers (e.g. CD56/CD3). In these cases, the marker settings were adjusted. We did not observe significant batch effect association of age and sex when testing against the month of collection (data not shown).

#### **Flow cytometry measurements and data analysis**

Data were acquired with a Navios Flow Cytometer as described above. Each sample suspended in 100 µl was measured for 60 seconds representing 75% of the sample volume. This prevented the intake of air leading to a nonspecific signal at the end of measurement. For the flow cytometry analysis a manual gating strategy was conducted. Each analysis was verified by two independent specialists to prevent gating errors. Analysed data was stored batch wise per 20 samples each. The statistics were exported batch wise for further analysis.

#### **Serum Immunoglobulin levels**

Serum levels of IgG, IgM and IgA were determined by immunonephelometry using a Beckman Coulter Immage (Beckman Coulter, Fullerton, CA, USA) and Beckman Coulter reagents. Measurements were standardized using certified European reference material 470 (ERM®-DA470). Reference values for serum Ig are: total IgG, 7.0-16 g/l; IgM, 0.4-2.3 g/l; and IgA, 0.7-4.0 g/l. IgG subclass measurements were performed in serum on a BN<sup>TM</sup> II immunonephelometer (Siemens Healthcare, Erlangen, Germany) using the Binding Site© (Birmingham, UK) Human IgG Subclass BN II Combi Kit. Values were standardized using the N protein standard SL (OQIM, Siemens Healthcare), which is based on the Sanquin (Amsterdam, Netherlands) nephelometric standard M1590. Reference values are: IgG1 4.9-11.4 g/l, IgG2 1.5-6.4 g/l, IgG3 0.2-1.1 g/l and IgG4 0.08-1.4 g/l.

#### **Serum hormone levels**

Free Thyroxin (FT4 gen II) and TSH were analysed on a Modular E170 random access analyzer (Roche Diagnostics, Mannheim).

#### **Vitamin D measurements**

25-hydroxy vitamin D<sub>3</sub> (25OH-vitamin D<sub>3</sub>) was analysed by liquid chromatography-tandem mass spectrometry after protein precipitation and solid-phase extraction. Internal standard [<sup>2</sup>H<sub>3</sub>] 25OH-vitamin D<sub>3</sub> (Bioconnect) was added to 100 µL serum. 50 µL NaOH (2M) was added to release protein-bound 25OH-vitamin D<sub>3</sub> and 500 µL Acetonitrile/Methanol (9:1) was subsequently added for protein precipitation. 700 µL H<sub>2</sub>O was added to 400 µL supernatant followed by solid phase extraction (Oasis HLB 1cc, Waters). Columns were conditioned with 1 mL methanol/isopropanol (95:5) and subsequently washed with 1 mL H<sub>2</sub>O. After application of the sample, columns were washed with 1 mL H<sub>2</sub>O and 1 mL methanol/H<sub>2</sub>O (60:40). The eluate (300 µL methanol/isopropanol 95:5) was diluted with H<sub>2</sub>O (3:1) and injected (10 µL) into an Agilent Technologies 1290 Infinity VL ultra high performance liquid chromatography-system (Agilent Technologies, Santa Clara, CA) equipped with a BEH C18 (1.7µm 2.1 X 50mm) analytical column (Waters Corp.) at 45°C. Mobile phase A (methanol:water 20:80 + 2 mM NH<sub>4</sub>CH<sub>3</sub>COO + 0.1% formic acid) and B (methanol:water 98:2 + 2 mM NH<sub>4</sub>CH<sub>3</sub>COO + 0.1% formic acid) were run in a gradient (0.4 mL/min). The gradient program was as follows: Start gradient 30:70 A:B to 5:95 A:B in 3.5 min and return to 30:70 A:B in 0.5 min. Retention time was 2.73 min. Total run time was 4 minutes. An Agilent 6490 tandem mass spectrometer (Agilent Technologies) was operated in the electrospray positive ion mode with a capillary voltage 3.5 kV, fragmentor voltage 380 V, sheath gas temperature 350 °C and gas temperature 100 °C with N<sub>2</sub> collision gas. Both 25OH-vitamin D<sub>3</sub> and 25OH-vitamin D<sub>3</sub> [-H<sub>2</sub>O] (in-source fragmentation) were used for quantification (results were averaged) with both transitions (qualitative and quantitative) monitored. Transitions (Q1>Q3) were m/z 401.4 > 159.1 (27 KEV) and m/z 401.4 > 107.1 (27 KEV) for 25OH-vitamin D<sub>3</sub>; m/z 404.4 > 109.1 (27 KEV) and m/z 404.4 > 162.1 (30 KEV) for [<sup>2</sup>H<sub>3</sub>] 25OH-vitamin D<sub>3</sub>; m/z 383.4 > 107.1 (36 KEV) and m/z 383.4 > 257.2 (16 KEV) for 25OH-vitamin D<sub>3</sub> [-H<sub>2</sub>O]; m/z 386.4 > 109.1 (27 KEV) and m/z 386.4 > 162.1 (27 KEV) for [<sup>2</sup>H<sub>3</sub>] 25OH-vitamin D<sub>3</sub> [-H<sub>2</sub>O]. Dwell time was 25 ms. An 8-point calibration curve was used, and the absolute concentration of the calibrator (Sigma-Aldrich) was assessed by spectrophotometry (264 nm). The method was linear assessed by CLSI EP6 protocol.

Recovery was between 90–109%. The within-run and between-run CV was 6.4% and 6.1% at 23 nmol/L and 5.1% and 5.5% at 81 nmol/L, as assessed by adapted CLSI EP5 protocol. LOQ was 7 nM (10% CV).

### **Steroid hormone measurements**

Cortisol, 11-deoxycortisol, 17-hydroxyprogesterone, testosterone and progesterone were analysed by liquid chromatography-tandem mass spectrometry after protein precipitation and solid-phase extraction. Internal standard [<sup>2</sup>D<sub>4</sub>] cortisol, [<sup>2</sup>D<sub>5</sub>] 11-deoxycortisol, [<sup>14</sup>C<sub>3</sub>] 17-hydroxyprogesterone, [<sup>13</sup>C<sub>3</sub>]-testosterone (Isoscience, King of Prussia, PA) and [<sup>2</sup>H<sub>9</sub>]-progesterone (CDN isotopes) was added to 100 µL serum. Subsequently, 300 µL Acetonitrile + 0.1% formic acid was added for protein precipitation. 300 µL H<sub>2</sub>O was added to 200 µL supernatant followed by solid phase extraction (Oasis HLB 1cc, Waters). Columns were pre-equilibrated with 1 mL methanol:isopropanol (95:5) and subsequently washed with 1 mL H<sub>2</sub>O. After application of the sample, columns were washed with 1 mL H<sub>2</sub>O and 1 mL methanol/H<sub>2</sub>O (30:70). The 300 µL eluate (methanol/isopropanol 95:5) was dried under a stream of N<sub>2</sub> gas, reconstituted in methanol:water (30:70) and injected (10 µL) into an Agilent Technologies 1290 Infinity VL ultra high performance liquid chromatography-system (Agilent Technologies, Santa Clara, CA) equipped with a BEH C18 (1.7µm 2.1 X 50 mm) analytical column (Waters Corp.) at 60°C. Mobile phase A (methanol:water 20:80 + 2 mM NH<sub>4</sub>CH<sub>3</sub>COO + 0.1% formic acid) and B (methanol:water 98:2 + 2 mM NH<sub>4</sub>CH<sub>3</sub>COO + 0.1% formic acid) were run in a gradient (0.4 mL/min). The gradient program was as follows: Start gradient 70:30 A:B for 2.5 min; then to 40:60 A:B in 3.5 min; followed by a gradient in 0.5 min to 2:98 to remain such for 0.5 min; and thereafter to 70:30 A:B in 0.5 min and remain such for 0.5 min. Retention time was 1.6 (cortisol), 2.8 (11-deoxycortisol), 4.4 (testosterone), 4.9 (17-hydroxyprogesterone) and 6.1 (progesterone) min with a total run time of 8 minutes. A 9-point calibration curve was used (cortisol, 11-deoxycortisol, testosterone, 17-hydroxyprogesterone (Steraloids); progesterone (Sigma)). An Agilent 6490 tandem mass spectrometer (Agilent Technologies) was operated in the electrospray positive ion mode, with a capillary voltage 3.5 kV, fragmentor voltage 380 V, sheath gas temperature 350°C and gas temperature 150 °C with N<sub>2</sub> collision gas. Two transitions (qualitative and quantitative) were monitored. Transitions (Q1>Q3), collision energy and dwell time were m/z 363.4 > 97.1 (34 kEV) and m/z 363.4 > 121.1 (25 kEV) for cortisol (100 ms); m/z 367.4 > 97.1 (34 kEV) and m/z 367.4 > 121.1 (25 kEV) for [<sup>2</sup>D<sub>4</sub>] cortisol; m/z 347.2 > 109.1 (31 kEV) and m/z 347.2 > 97.1 (29 kEV) for 11-deoxycortisol (40 ms); m/z 352.3 > 113.1 (29 kEV) and m/z 352.3 > 100.1 (31 kEV) for [<sup>2</sup>D<sub>5</sub>] 11-deoxycortisol. m/z 331.3 > 109.1 (31 kEV) and m/z 331.3 > 97.1 (31 kEV) for 17-hydroxyprogesterone (60 ms); m/z 334.3 > 112.1 (29 kEV) and m/z 334.3 > 100.1 (29 kEV) for [<sup>14</sup>C<sub>3</sub>] 17-hydroxyprogesterone; m/z 289.2 > 109.1 (30 kEV) and m/z 289.2 > 97.1 (30 kEV) for testosterone (50 ms); m/z 292.3 > 112.1 (30 kEV) and m/z 292.3 > 100.1 (30 kEV) for [<sup>13</sup>C<sub>3</sub>]-testosterone; m/z 315.3 > 109.1 (29 kEV) and m/z 315.3 > 97.1 (29 kEV) for progesterone (100 ms); m/z 324.3 > 113.1 (29 kEV) and m/z 324.3 > 100.1 (29 kEV) for [<sup>2</sup>H<sub>9</sub>]-progesterone. The method was linear for all steroids assessed by CLSI EP6 protocol. Recovery was 103% (cortisol), 97% (11deoxycortisol), 103% (17-hydroxyprogesterone), 98.4-103% (testosterone) and 99.8-102% (progesterone).

Within-run and between-run CV was assessed by adapted CLSI EP5 protocol. For cortisol within-run and between-run CV is 3.0% and 4.0% at 303 nmol/L and 2.5% and 3.4% at 1087 nmol/L. For 11-deoxycortisol, within-run and between-run CV is 4.8% and 6.6% at 2.1 nmol/L and 4.1% and 5.9% at 25.6 nmol/L. For 17-hydroxyprogesterone, within-run and between-run CV was 5.9% and 6.1% at 2.5 nmol/L and 4.9% and 5.1% at 91 nmol/L. For testosterone, within-run and between-run CV was 4.1% and 6.0% at 0.9 nmol/L and 3.3% and 5.3 at 19 nmol/L. For progesterone, within-run and between-run CV is 2.8% and 5.1% at 4.9 nmol/L and 3.4% and 6.1 at 28 nmol/L. LOQ was 0.10 nmol/L (10% CV), 0.10 nmol/ L (10% CV), 0.05 nmol/L (15% CV) and 0.25 nmol/ L (15% CV) for 11-deoxycortisol, 17-hydroxyprogesterone, testosterone and progesterone, respectively.

### **Statistical analysis**

To test for association of cell counts or Ig levels with age, we normalized the immune traits as described above, then corrected for the effects of gender and season using a linear model. Using Spearman correlation analysis, we ascertained the significance and direction of the correlations. Significance was declared after controlling for multiple testing (FDR ≤ 0.05).

To test whether gender had any effect on the inter-individual variation of the immune traits, we used the cell counts normalized using an IRT and the log<sub>2</sub> Igs levels, after correcting for the effect of age and season using a linear model. A paired T-test between the gender-stratified samples was carried out. Significance was declared after correcting for multiple testing (FDR ≤ 0.05).

To investigate the effect of season on the immune traits measured; we also made use of the IRT cell counts and log<sub>2</sub> Igs levels. A cosinor model was fitted with the day of the year, in a one-year cycle period, using sex and age as covariates. The fitted model was compared with a reduced model without the season information and significance was ascertained (multiple correction testing; FDR ≤ 0.05) using a variance test between the full model (with season information) and the incomplete model (Dopico et al., 2015).
